# Supplementary material
Source: publisher figshare collection journal article supplement (https://acs.figshare.com/ndownloader/files/4382116)

## Supporting Information for

Kinetics of  $\text{NO} + \text{H}^+ + \text{NO}_3^- \rightarrow \text{NO}_2 + \text{HNO}_2$  on BaNa-Y:  
Evidence for a diffusion limited  $\text{A} + \text{B} \rightarrow 0$  Reaction on a Surface.

*Aditya Savara and Eric Weitz\**

Department of Chemistry and the Institute for Catalysis in Energy Processes,

Northwestern University, 2145 Sheridan Road, Evanston, IL 60208

\* To whom correspondence should be addressed. E-mail: weitz@northwestern.edu

**Outline:**

|       |                                                                         |    |
|-------|-------------------------------------------------------------------------|----|
| I.    | Nitrate Peak Integration.....                                           | 1  |
| II.   | Experimental Conditions .....                                           | 2  |
| III.  | First and Second-Order Data Fitting .....                               | 4  |
|       | A. Rate Forms and Results.....                                          | 4  |
|       | B. Taylor-Weinberg Analysis for First and Second-Order Models....       | 7  |
|       | C. Details and Parameters from Data Fitting and Half-life Analysis...   | 11 |
| IV.   | Spline-fitting of Alpha Plots.....                                      | 16 |
| V.    | Estimating the Activation Energy for Diffusion.....                     | 19 |
| VI.   | Discussion on Values Obtained for the Diffusion Coefficient.....        | 22 |
| VII.  | Estimation of Crystallite Surface Area.....                             | 24 |
| VIII. | References.....                                                         | 25 |
| IX.   | Appendix S.1: Parameters obtained from first and second-order fits..... | 27 |
| X.    | Appendix S.2: Programs used in spline-fitting alpha plots.....          | 33 |
| XI.   | Appendix S.3: Alpha plots of experiments.....                           | 64 |

**I. Nitrate Peak Integration**

The surface nitrate peaks on Na-Y and BaNa-Y, which have been identified based on prior assignments reported in the literature, absorb in the region from 1500 to 1300  $\text{cm}^{-1}$  and are centered at approximately 1400  $\text{cm}^{-1}$ .<sup>1-6</sup> For BaNa-Y, the nitrate peak was integrated from 1554 to 1241  $\text{cm}^{-1}$ , with the baseline defined by drawing a line from 1554 to 1241  $\text{cm}^{-1}$ . A second approach was used for BaNa-Y to verify that the choice of baseline did not affect the rate constants obtained from the fitting procedure: The “right”

portion of the nitrate peak was integrated from  $1342\text{ cm}^{-1}$  to  $1262\text{ cm}^{-1}$ , with the baseline defined using a line drawn from  $1342\text{ cm}^{-1}$  to  $1262\text{ cm}^{-1}$ . For Na-Y, the nitrate peak was integrated from  $1554$  to  $1360\text{ cm}^{-1}$ , with a baseline defined from  $1554$  to  $1153\text{ cm}^{-1}$ . The integrated areas for these nitrate peaks were divided by the integrated area of a zeolite framework absorption, determined by integrating this latter absorption band from  $1263$  to  $989\text{ cm}^{-1}$ , with a baseline determined by a line drawn from  $1263$  to  $985\text{ cm}^{-1}$ . By dividing the integrated area of the nitrate peaks by the integrated area of the zeolite framework absorption, the values thus obtained were quantitatively proportional to the absolute concentration of surface nitrates, and allowed kinetic data to be compared between samples.

## II. Experimental Conditions:

Experiments were conducted at temperatures from  $100$  to  $300\text{ }^{\circ}\text{C}$ , with varied initial nitrate coverages,  $[\text{NO}_3^-]_0$ , and NO pressures that varied by up to a factor of 10.

The full range of conditions studied is shown in Table S.1.

**Table S.1.** Experimental Conditions Tested

| Experiment # | Sample Type | Temperature ( $^{\circ}\text{C}$ ) | $[\text{NO}_3^-]_0$ , a.u. | $[\text{NO}]$ , torr |
|--------------|-------------|------------------------------------|----------------------------|----------------------|
| 16           | BaNa-Y-1    | 200                                | 8.597623                   | 0.96                 |
| 17           |             | 200                                | 8.430677                   | 0.75                 |
| 18           |             | 200                                | 8.508355                   | 1.34                 |
| 19           |             | 200                                | 8.743717                   | 1.13                 |
| 21           |             | 200                                | 8.062429                   | 1.0                  |
| 22b          |             | 200                                | 8.121394                   | 1.18                 |
| 22f          |             | 200                                | 6.35009                    | 0.784                |
| 30           |             | 200                                | 5.497148                   | 1.176                |
| 22c          |             | 100                                | 11.2937                    | 0.862                |
| 22e          |             | 100                                | 9.524985                   | 0.791                |
| 22d          |             | 150                                | 10.84154                   | 0.785                |
| 60           |             | 250                                | 14.72096                   | 1.15                 |
| 61           |             | 250                                | 13.51955                   | 1.08                 |
| 62           |             | 250                                | 12.51471                   | 1.32                 |
| 73           |             | 250                                | 11.10562                   | 13.4                 |
| 74           |             | 250                                | 8.089615                   | 0.3                  |

|       |          |     |          |        |
|-------|----------|-----|----------|--------|
| 75    |          | 250 | 8.887324 | 12.6   |
| 77    |          | 250 | 2.500379 | 0.01   |
| 79    |          | 250 | 2.289777 | 0.02   |
| 80    |          | 250 | 3.400929 | 0.03   |
| 63    |          | 300 | 13.93502 | 1.37   |
| 71    |          | 300 | 3.024014 | 0.2    |
| 72    |          | 300 | 7.606979 | 5      |
| <hr/> |          |     |          |        |
| 153   | BaNa-Y-2 | 250 | 4.876794 | 9.92   |
| 154   |          | 250 | 3.317197 | 0.82   |
| 155   |          | 250 | 9.745098 | 1.806  |
| 158   |          | 250 | 4.02568  | 2.04   |
| 159   |          | 250 | 9.014925 | 0.914  |
| 160   |          | 250 | 5.971154 | 1.9    |
| 165   |          | 250 | 3.654883 | 1.928  |
| 161   |          | 300 | 6.390459 | 1.8778 |
| 162   |          | 300 | 7.823741 | 2.37   |
| 163   |          | 300 | 5.251259 | 1.4    |
| <hr/> |          |     |          |        |
| 166   | Na-Y     | 150 | 3.001852 | 1.796  |
| 167   |          | 150 | 6.634371 | 2.232  |
| 168   |          | 150 | 7.916979 | 3.32   |

There are several possible sample-related sources of scatter for the quantity of nitrates remaining at the end time (or the end-time itself). As mentioned in Section III.A of the article, the  $\text{Ba}^{2+}$  and  $\text{Na}^+$  ions in the zeolite are the binding sites for the nitrates.<sup>7</sup> These nitrates likely do not all have the same binding energy, but rather are bound to sites which exhibit a distribution of binding energies.<sup>7</sup> As discussed in Section V.B of the article, the distribution of nitrate binding energies could potentially affect the quantity of nitrates remaining at the end of reaction (as discussed in Section V.B of the article). Also, if the nitrate distribution affects the spatial distribution of the reactants or the diffusion coefficient for  $\text{H}^+$ ,<sup>8</sup> this could potentially lead to scatter in the end-times of reaction observed based on the relations in Table 1 of the article (factors which govern the end-time of reaction are discussed in Sections V.A to V.D of the article).

In these experiments, there are also two conditions which might lead to changes in the surface fractal dimension between experiments. Prior to every experiment, the sample is calcined (heated to high temperatures) to remove water. We have found that

the normalized saturation coverage of the nitrates in the beam path decreases on the order of ~5% with every calcination. We interpret this observation as indicating that the sample slightly dealuminates after each calcination, as nitric acid is known to leach *at least* extraframework aluminum from zeolites.<sup>9-11</sup> Dealumination may result in slightly different surface fractal dimensions for different experiments.<sup>12,13</sup> Additionally, the adsorbed nitrates may also change the surface fractal dimension as a function of coverage, as they likely occupy a volume on the same scale as  $\text{NH}_3/\text{NH}_4^+$  -- and exchange of  $\text{Na}^+$  with  $\text{NH}_4^+$  has been shown to change the fractal dimension.<sup>13</sup> However, as is shown in the article, although there is scatter in the data for the fitted end-times of reaction, approximating the surface fractal dimension as remaining constant during a single experiment and between experiments still yields relatively good agreement with theoretical predictions.

### III.A First-Order and Second-Order Data Fitting.

The rate expressions that were fitted are presented in Table S.2. In each case, it was necessary to assume that some nitrates were unreactive to obtain reasonable fits. More details on the fitting are given in Section III.C. Arrhenius plots using the average values for  $k_{\text{obsA}}$ ,  $k_{\text{obsB}}$ ,  $k_{\text{obsA}}/[\text{NO}]$  and  $k_{\text{obsB}}/[\text{NO}]$  are shown in Figure S.1. The slope of linear regression is the activation energy,  $E_a$ , in Joules, while the y-intercept is the natural log of the pre-exponential,  $A$ , of the rate constant. The values obtained from these linear fits for  $\ln(k_{\text{obsA}})$  and  $\ln(k_{\text{obsA}}/[\text{NO}])$  are given in Table S.1. There were not enough data points to provide a reliable fit for  $k_{\text{obsB}}$ .

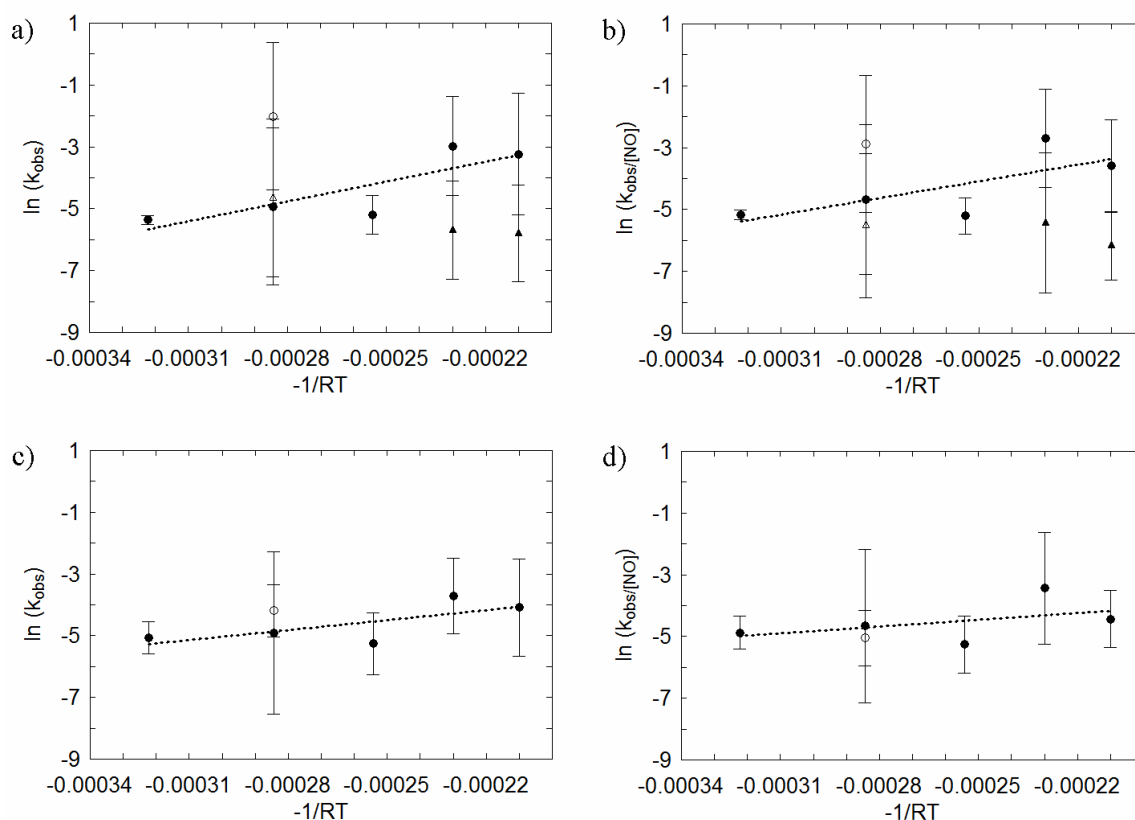

**Figure S.1:** Arrhenius plots. a) first-order  $k_{\text{obs}}$ , b) first-order  $k_{\text{obs}}/[\text{NO}]$ , c) second-order  $k_{\text{obs}}$ , d) second-order  $k_{\text{obs}}/[\text{NO}]$ . Symbols:  $\bullet$  BaNa-Y  $k_{\text{obsA}}$ ,  $\blacktriangle$  BaNa-Y  $k_{\text{obsB}}$ ,  $\circ$  Na-Y  $k_{\text{obsA}}$ ,  $\triangle$  Na-Y  $k_{\text{obsB}}$ . Averaged values are plotted. The error bars shown are one standard deviation.

**Table S.2** Parameters for  $k_{\text{obsA}}$  calculated from Arrhenius plots.

| $[\text{NO}_3^-]$ order | Rate Form, $d[\text{NO}_3^-]/dt =$                                      | $k_A =$                       | A                                                   | $E_a$ , kJ/mol |
|-------------------------|-------------------------------------------------------------------------|-------------------------------|-----------------------------------------------------|----------------|
| First-order             | $k_A[(\text{NO}_3^-)_A] + k_B[(\text{NO}_3^-)_B]$                       | $k_{\text{obsA}}$             | $4 \times 10^0 \text{ s}^{-1}$                      | 20             |
| First-order             | $k_A[(\text{NO}_3^-)_A][\text{NO}] + k_B[(\text{NO}_3^-)_B][\text{NO}]$ | $k_{\text{obsA}}/[\text{NO}]$ | $1 \times 10^0 \text{ s}^{-1}$                      | 20             |
| Second-order            | $k_A[\text{NO}_3^-]^2$                                                  | $k_{\text{obsA}}$             | $2 \times 10^{-1} \text{ a.u.}^{-1} \text{ s}^{-1}$ | 10             |
| Second-order            | $k_A[\text{NO}_3^-]^2[\text{NO}]$                                       | $k_{\text{obsA}}/[\text{NO}]$ | $7 \times 10^{-2} \text{ a.u.}^{-1} \text{ s}^{-1}$ | 10             |

The standard deviations are quite large for the observed rate constants obtained from an average at each temperature. This is true both when NO is included in the rate equation as well as when NO is excluded from the rate equation. Despite the large

number of experiments performed, and the variety of conditions tested, none of the rate equations fit the data obviously better than when the data was fit to other rate equations: Instead, all rate equations tested resulted in large standard deviations for the rate constants extracted from multiple experimental runs, i.e. all rate constants that were obtained from fits gave similar error limits for the fitted values. In addition to large scatter in the rate constants obtained for these models, the data showed a decrease in the observed rate constant with time (i.e. --progression of reaction) for every model studied – that is, a plot of nitrate depletion versus time exhibited a functional form referred to as a “stretched exponential” (not shown). Further, the Arrhenius plots for all of the observed rate constants display a very low apparent activation energy ( < 40 kJ/mol) with unrealistically low pre-exponentials: For a surface reaction which is not diffusion limited a realistic pre-exponential is expected to be on the order of  $10^{13}$  to  $10^{19} \text{ s}^{-1}$ .<sup>14,15</sup>

The low apparent activation energies would in principle be consistent with the rate limiting step being desorption / decomposition of  $\text{HNO}_2$  (the expected product), -- as the desorption / decomposition of  $\text{HNO}_2$  on BaNa-Y has an activation energy of < 25 kJ/mol.<sup>16,17</sup> However, no  $\text{HNO}_2$  intermediate is observed at these temperatures, and such a mechanism would not, by itself, explain the stretched exponential behavior for the depletion of nitrates, or the apparent low pre-exponentials for the effective rate constant.

The apparent low activation energy and “stretched exponential” behavior could be indications of a diffusion limited reaction. The two obvious possibilities for the source of the diffusion limitation are the diffusion of NO into the zeolite crystals, or surface diffusion of the adsorbates. We showed previously that diffusion limited transport of NO gas molecules into the zeolite crystals (approximated as mass transport limited Fickian

diffusion into a sphere<sup>18</sup>), was an unlikely explanation for the observed kinetics, and also would not explain the depletion of nitrates observed on long time scales.<sup>19</sup> The possibility of a reaction limited by diffusion of surface species is explored in the main article. For thoroughness, a Taylor-Weinberg type analysis was also performed, as described in the following section.

### **III.B. Taylor-Weinberg Analysis for First and Second-Order Models**

Given the different kinetic regimes observed and the range of the initial coverages and NO pressures encompassed by the data, a Taylor-Weinberg type analysis was performed.<sup>20-22</sup> This analysis assumes that the rate constant is a function of coverage, and allows the pre-exponential and the activation energy to vary as functions of nitrate coverage.

For each experiment the data for the nitrate concentration as a function of time was fit using the function  $Ae^{-bt} + Ce^{-dt} + Ft + G$  (with an average  $R^2$  of 0.95), and the rate of nitrate depletion was evaluated as a function of coverage from these fits, at discrete coverages separated by intervals of 0.01 normalized integrated absorbance units (the units for nitrate coverage). Using these rates,  $k$  was calculated as a function of nitrate coverage for kinetic models that assumed either a first-order or second-order dependence on nitrate coverage and that either included or excluded [NO] in the rate equation. These models were applied to the data from all substrates (BaNa-Y-1, BaNa-Y-2, and Na-Y). The fitted rate constants, as a function of absolute coverage, were found to have overlapping ranges for all substrates studied, so the data for all substrates were treated as one large data set for the Taylor-Weinberg analysis for each kinetic model.

Figures S.2a and S.2b show the coverage dependent pre-exponential and activation energy curves obtained for  $k$  for the rate form  $k[\text{NO}][\text{NO}_3^-]^2$ , by using the Taylor-Weinberg analysis. The pre-exponential and activation energy curves do not have a monotonic dependence on the nitrate coverage – similar non-monotonic dependencies of the pre-exponential and activation energy on the coverage were obtained for the other three rate forms (see previous paragraph). The non-monotonic behavior in Figures S.2a and S.2b indicate that these models are unable to describe the data. Figure S.3 shows the poor  $R^2$  obtained from linear fits of the Arrhenius equation to the values obtained for  $k$  from the  $k[\text{NO}][\text{NO}_3^-]^2$  rate equation, as a function of nitrate coverage. The rate of depletion is more strongly correlated with the time elapsed from the start of reaction -- rather than with the nitrate coverage. This behavior is as expected for a DLAB0 reaction, and is discussed in the main article.

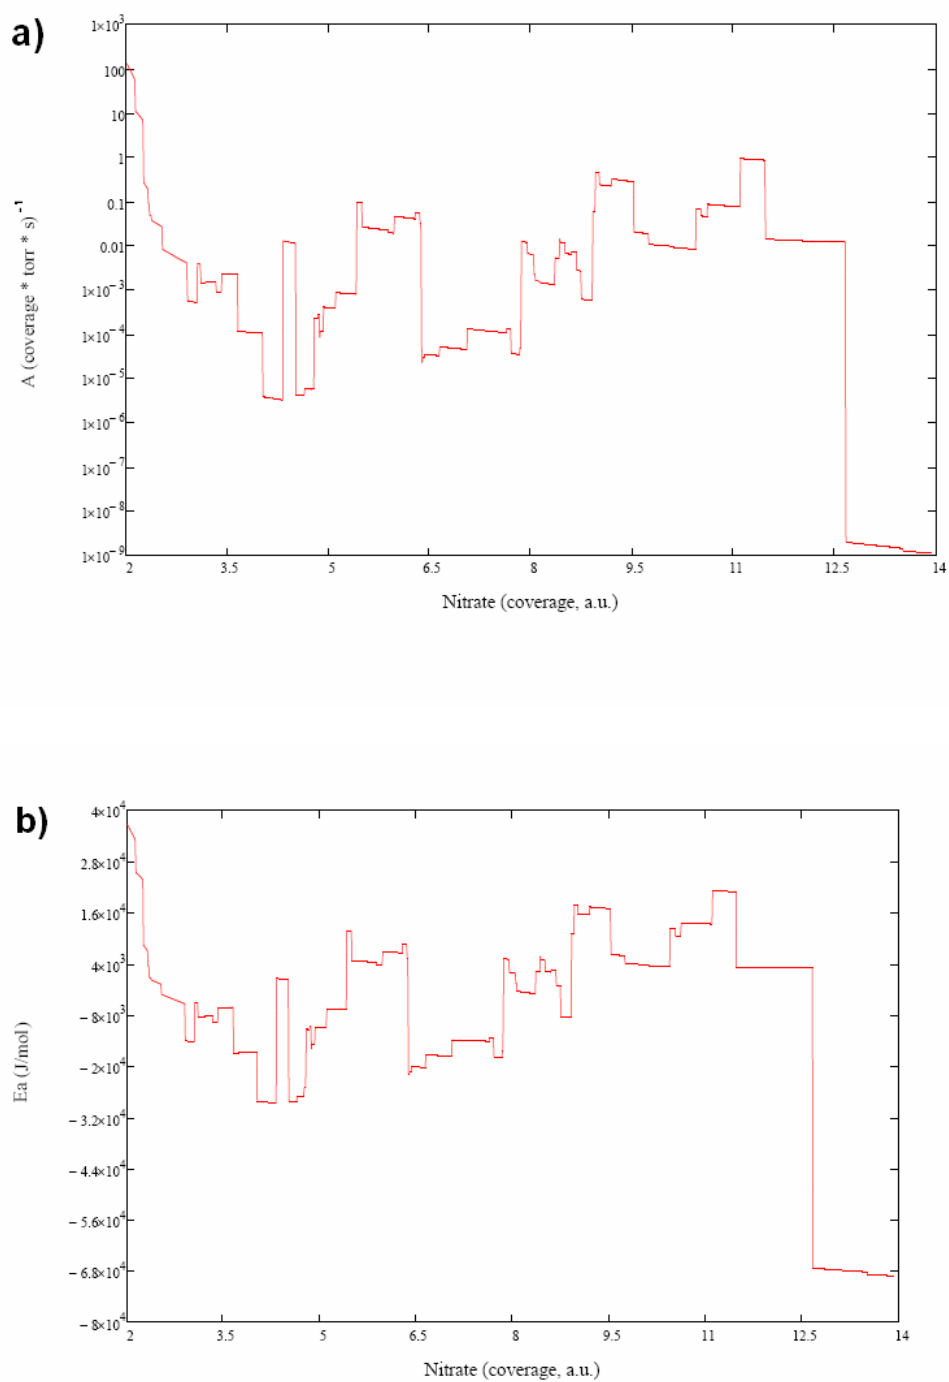

**Figure S.2** Pre-exponential and Activation energy of reaction as a function of coverage based on a Taylor-Weinberg analysis with the rate equation  $d[\text{NO}_3^-]/dt = k[\text{NO}][\text{NO}_3^-]^2$

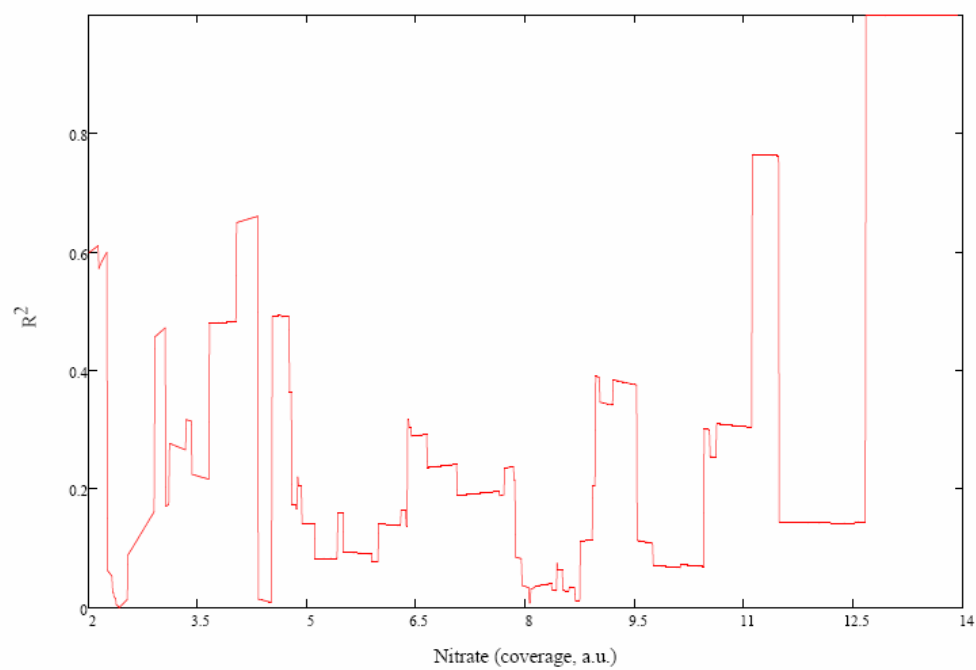

**Figure S.3**  $R^2$  as a function of coverage for the linear fits to the Arrhenius equation during the Taylor-Weinberg analysis with the rate equation  $d[\text{NO}_3^-]/dt = k[\text{NO}][\text{NO}_3^-]^2$

### III.C. Details on Fitting to the First-Order and Second-Order Models:

Surface nitrates had a rapid initial depletion (< 60 s) followed by a slower depletion at longer times (up to 10,000 s). To obtain rate constants, the nitrate depletion was fitted with modified versions of the following rate forms, as discussed in more detail below:

$$d[\text{NO}_3^-]/dt = k_{\text{obsA}}[(\text{NO}_3^-)_A] \quad (1)$$

$$d[\text{NO}_3^-]/dt = k_{\text{obsA}}[(\text{NO}_3^-)_A] + k_{\text{obsB}}[(\text{NO}_3^-)_B] \quad (2)$$

$$d[\text{NO}_3^-]/dt = k_{\text{obsA}}[\text{NO}_3^-]^2 \quad (3)$$

Eqs 1 to 3 were modified to include the assumption that some nitrates are completely unreactive on exposure to NO. Thus, the following integrated rate equations were used for fitting the nitrate depletion data, with Eqs. 4,5,6 corresponding to Eqs. 1,2,3, respectively:

$$[(\text{NO}_3^-)] = [(\text{NO}_3^-)_A]_0 e^{-k_{\text{obsA}}t} + [(\text{NO}_3^-)_U]_0 \quad (4)$$

$$[(\text{NO}_3^-)] = [(\text{NO}_3^-)_A]_0 e^{-k_{\text{obsA}}t} + [(\text{NO}_3^-)_B]_0 e^{-k_{\text{obsB}}t} + [(\text{NO}_3^-)_U]_0 \quad (5)$$

$$[(\text{NO}_3^-)] = 1/([(\text{NO}_3^-)_A]_0^{-1} + k_{\text{obsA}}t) + [(\text{NO}_3^-)_U]_0 \quad (6)$$

$[(\text{NO}_3^-)_U]_0$  represents nitrates which are unreactive. On BaNa-Y at lower temperatures ( $\leq 200$  °C), Eqs. 4 and 6 yielded adequate fits for a first-order and second-order dependence on nitrate coverage, respectively. For the experiments performed at high temperatures ( $\geq 250$  °C) on BaNa-Y, and for the experiments at 150 °C on Na-Y, only Eqs 5 and 6 yielded adequate fits for first-order and second-order nitrate dependence, respectively. A fit was deemed inadequate if the curve fitting routine in Sigmaplot returned any of the following: a non-convergence error, extraordinarily large standard fitting errors for any parameter (i.e., a magnitude greater than the parameter itself, in this case errors >10,000), or a fitting dependency of >0.99 on any parameter. Each of these

are indications of an inaccurate and/or imprecise fit, as described in the Sigmaplot programming guide.<sup>23</sup>

In addition to fitting the nitrate depletion data directly,  $k_{\text{obsA}}$  was also obtained from the corresponding half-life equations derived from integrated rate laws, with the experimental “total” half-depletion value – the point at which half of all reactive nitrates are depleted – given by  $[\text{NO}_3^-]_{1/2} = ([\text{NO}_3^-]_{\text{initial}} - [\text{NO}_3^-]_{\text{final}})/2$ . This approximation again assumes that unreactive nitrates remain after the rest of the nitrates have reacted. In the case of the first-order fits described in the previous paragraph (with Equation 5), it was assumed that there were two parallel first-order processes, yielding two observed rate constants,  $k_{\text{obsA}}$  and  $k_{\text{obsB}}$ . During the first-order half-life analysis, the rate constant was taken to be reflective of only the faster first-order process,  $k_{\text{obsA}}$ , with the effects of  $k_{\text{obsB}}$  approximated as having a negligible effect on the “total half-life” obtained from the time at which the experimental nitrates concentration is equal to  $[\text{NO}_3^-]_{1/2}$  (as defined above). This approximation, that  $k_{\text{obsB}}$  would have a negligible contribution to the rate constant obtained from the “total half-life”, is reasonable given that the total nitrate depletion observed is dominated by the much faster initial reaction:  $k_{\text{obsA}} \gg k_{\text{obsB}}$  and  $[(\text{NO}_3^-)_A] > [(\text{NO}_3^-)_B]$ . As can be seen by comparing Figures S.4 to S.7, nearly all of the values obtained from the half-life analysis are within one standard deviation of the values obtained from fitting equations 4 through 6. Thus, the values for  $k_{\text{obsA}}$  from the half-life analysis (this paragraph) and from the fitting analysis (previous paragraph) were averaged, and the final values are presented in Table S.2 (the values in Table S.2 have also been averaged across both of the nitrate peak areas as defined in Section I).

The units for the first-order rate constants are  $\text{s}^{-1}$ , and the units for the second-order rate constants are  $\text{a.u.}^{-1} \text{s}^{-1}$ , where a.u. are the normalized arbitrary units which arise from dividing the integrated area of the surface nitrate infrared peak by the integrated area of the zeolite framework infrared peak, as described in Section S.I. The observed rate constants and parameters obtained from fitting the data are included in Appendix S.1. The relations between these “observed rate constants” and the final “calculated rate constants” are shown in Table S.2 in Section III.A. For second-order rate constants, the observed rate constants obtained from monitoring the “right” BaNa-Y nitrate peak were scaled to those of the “full” BaNa-Y nitrate peak using a factor of 10.5. This scaling was necessary for a direct comparison of the observed second-order rate constants, as prior to this scaling the observed second-order rate constants obtained from the “right” BaNa-Y nitrate peak and “full” BaNa-Y nitrate peak were not normalized to the same concentration units. The scaling factor is based on the average quantity of reactive nitrates obtained from a second-order fit. This factor was obtained by dividing the average of the second column of Table S.4d by the average of the second column of Table S.4e. As shown in Figures S.4 to S.7, for each rate equation, the values obtained for the rate constants were within one standard deviation regardless of the method used. Thus, the values presented in Table S.2 are averages of all the values obtained by both methods (half-life analysis and fitting) and for both peak definitions for  $k_{\text{obsA}}$ , and,  $k_{\text{obsB}}$ ,  $k_{\text{obsA}}/[\text{NO}]$ , and  $k_{\text{obsB}}/[\text{NO}]$ .

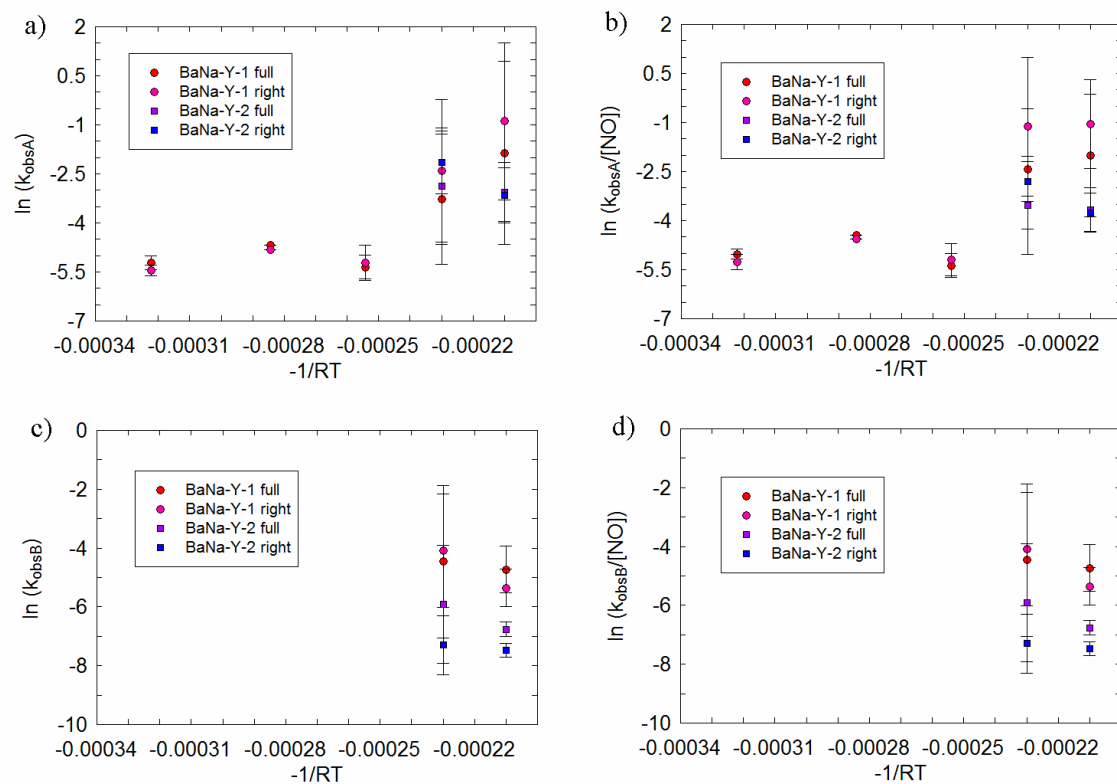

**Figure S.4** Arrhenius plots for observed rate constants obtained from first-order fitting.

Points are averaged values, error bars shown are one standard deviation.

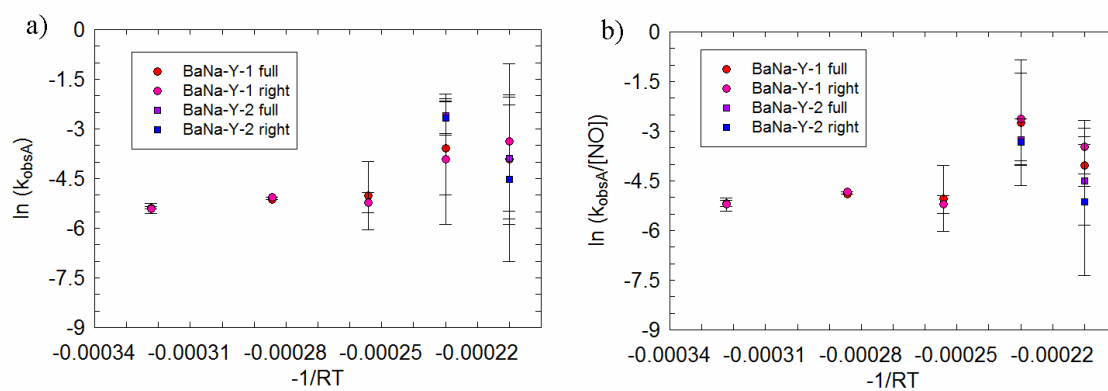

**Figure S.5** Arrhenius plots for observed rate constants obtained from first-order half-life analysis.

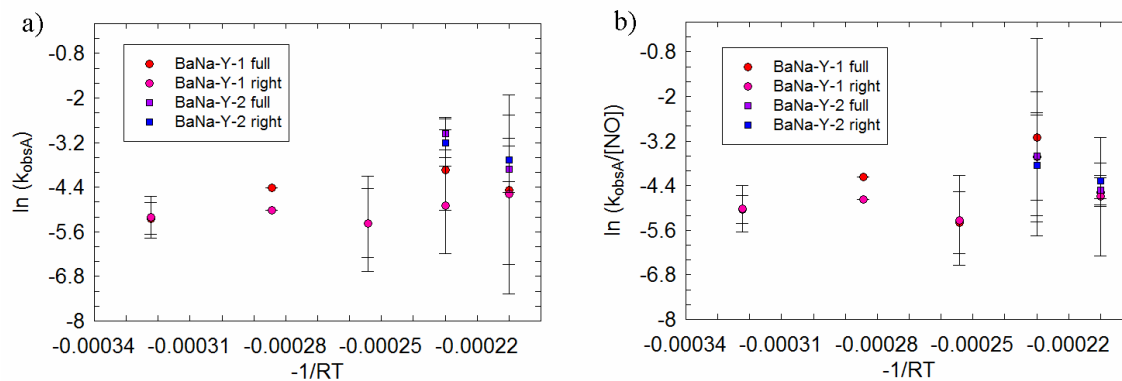

**Figure S.6** Arrhenius plots for observed rate constants obtained from second-order fitting.

Points are averaged values, error bars shown are one standard deviation.

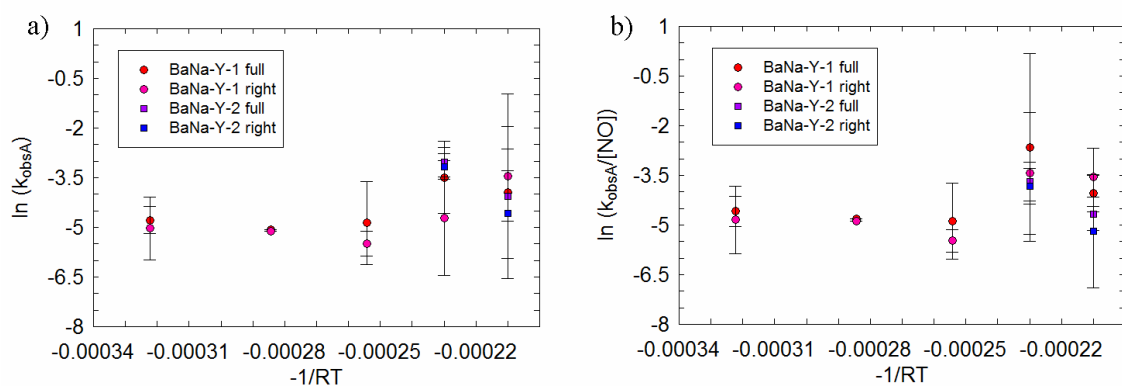

**Figure S.7** Arrhenius plots for observed rate constants obtained from second-order half-life analysis.

#### IV. Spline-Fitting of Alpha Plots

Alpha in equation 9 of the published article is obtained from the slope of a plot of  $\log(1/[\text{NO}_3^-]-1/[\text{NO}_3^-]_0)$  vs.  $\log(\text{time})$ . As described in Section III.C of the published article the theoretical value for alpha on BaNa-Y and Na-Y is expected to be  $\alpha \approx 0.5$ . The alpha plots for the different experiments are shown in Appendix S.3. Determining the time region of the Zeldovich regime is a difficult spline-fitting problem – particularly due to the fact that the noise varies as a function of time (as mentioned in section IV of the article), and due to the fact that the piece-wise nature of the data is expected to change as an undetermined non-linear function of the experimental conditions (e.g., NO concentration, distribution of sites occupied, and Temperature). For more information about the difficulties in spline-fitting data in the presence of noise, see for example “Local Linear Regression” in reference 23.<sup>24</sup> Custom spline-fitting programs written in Python were used to find the onset and end-time of the Zeldovich regime. These programs are included in Appendix S.2, and each requires the data to be provided in a comma-separated values file with no column headings. The custom written program named Nt2 finds the rolling slope of  $\log(\text{time})$  vs.  $1/[\text{NO}_3^-]-1/[\text{NO}_3^-]_0$ , and was used first to determine at which time the slope was best approximated as 0.5. The custom written programs Ntf7 and Ntf8 were given this time as an input, and both programs then spline-fit the data, returning the data points corresponding to the onset and end-time. Ntf7 fits the linear region corresponding to the Zeldovich regime with a fixed slope (0.5) while Ntf8 allows the slope to vary during fitting (typically 0.4 to 0.6 after fitting). The true endpoints can be generally expected to fall between these two cases. The results from fitting the data are shown in Table S.3. In some experiments, the depletion of surface

nitrates was not monitored until the end of the Zeldovich regime, as it was not possible to gauge when the end-time would occur during the experiments. Thus, in some cases, the true  $\tau_f$  is  $\geq$  the recorded  $\tau_f$ . Large fitting errors result from the noise (scatter) and fluctuation (“waviness”) in the data (shown in the alpha plots in Appendix S.3). The fitting errors for  $\tau_f$  cannot be readily quantified as the magnitude of the noise and fluctuation varies between experiments, as well across time in the same experiment. However, the noise and fluctuations do not appear to affect the slopes of the alpha plots on the scale of several orders of magnitude of time (note that x-axis in alpha plots is the log of time) and given that the time at which  $\tau_f$  occurs is determined based on a change in slope in the alpha plots, we estimate that the fits to determine  $\tau_f$  are accurate to an order-of-magnitude in time, which is consistent with the scatter observed in Figures 2 and 3 of the published article. The  $\tau_f$  values obtained from both ntf7 and ntf8 were used to produce the plots shown in the published article, as well as for Figure S.8 below. In Figure S.8, the x and y axes have the same scale, and it is clear that  $\log(\tau_f)$  does not correlate directly with  $[\text{NO}_3^-]_0$ . The values for  $[\text{NO}_3^-]$  at  $\tau_f$  shown in Figure 4 of the published article are the values of  $[\text{NO}_3^-]$  at  $\tau_f$  from ntf7, though the values obtained for  $[\text{NO}_3^-]$  at  $\tau_f$  from ntf8 were very similar and are only omitted from the bar graph presented in Figure 4 of the published article for clarity.

**Table S.3.** Fitting Results for  $\tau_f$ 

| Experiment # | Sample Type | $\tau_f$ from ntf7 | $\tau_f$ from ntf8 | [NO <sub>3</sub> ] at $\tau_f$<br>from ntf7 | [NO <sub>3</sub> ] at $\tau_f$<br>from ntf8 |
|--------------|-------------|--------------------|--------------------|---------------------------------------------|---------------------------------------------|
| 16           | BaNa-Y-1    | 2.11               | 2.39               | 6.826779                                    | 6.459968                                    |
| 17           |             | 2.54               | 2.56               | 6.81372                                     | 6.791179                                    |
| 18           |             | 2.77               | 2.77               | 7.839163                                    | 7.851512                                    |
| 19           |             | 2.91               | 2.91               | 8.009894                                    | 8.063157                                    |
| 21           |             | 2.86               | 2.68               | 6.272539                                    | 6.464358                                    |
| 22b          |             | 2.92               | 2.91               | 6.688625                                    | 6.540824                                    |
| 22f          |             | 2.41               | 2.75               | 10.47487                                    | 10.06647                                    |
| 22c          |             | 3.09               | 3                  | 9.399727                                    | 9.435376                                    |
| 22e          |             | 2.82               | 2.77               | 8.959245                                    | 8.773412                                    |
| 22d          |             | 2.47               | 2.47               | 6.175931                                    | 1.546477                                    |
| 60           |             | 1.8                | 2.49               | 8.717328                                    | 8.428954                                    |
| 61           |             | 1.74               | 1.74               | 8.351575                                    | 7.725496                                    |
| 62           |             | 2.09               | 1.89               | 7.060601                                    | 7.172736                                    |
| 73           |             | 0.99               | 0.89               | 10.30436                                    | 10.76006                                    |
| 74           |             | 2.02               | 2.43               | 1.600681                                    | 2.393133                                    |
| 75           |             | 2.02               | 1.92               | 6.631469                                    | 6.534404                                    |
| 77           |             | 2.47               | 2.45               | 8.517967                                    | 8.776183                                    |
| 79           |             | 2.71               | 2.71               | 8.016592                                    | 7.753558                                    |
| 80           |             | 2.74               | 2.37               | 7.90324                                     | 7.972297                                    |
| 63           |             | 1.785              | 1.785              | 2.26879                                     | 2.235628                                    |
| 71           |             | 3.4                | 2.57               | 2.205491                                    | 1.622716                                    |
| 72           |             | 1.48               | 1.8                | 2.69206                                     | 2.810496                                    |
| 153          | BaNa-Y-2    | 0.47               | 1.81               | 3.679977                                    | 2.934522                                    |
| 154          |             | 1.92               | 1.89               | 2.281852                                    | 2.138169                                    |
| 155          |             | 1.26               | 1.78               | 5.352548                                    | 5.265791                                    |
| 158          |             | 1.81               | 1.8                | 2.51506                                     | 2.420105                                    |
| 159          |             | 1.69               | 1.72               | 5.308052                                    | 5.408987                                    |
| 160          |             | 1.76               | 1.86               | 5.016666                                    | 5.030267                                    |
| 165          |             | 1.73               | 1.73               | 5.103187                                    | 4.966929                                    |
| 161          |             | 2.17               | 1.94               | 5.31874                                     | 5.396961                                    |
| 162          |             | 1.72               | 1.72               | 4.791448                                    | 4.67547                                     |
| 163          |             | 2.24               | 2.92               | 2.023837                                    | 2.005926                                    |
| 166          | Na-Y        | 1.85               | 1.92               | 2.641772                                    | 2.63429                                     |
| 167          |             | 1.72               | 1.72               | 3.024705                                    | 3.025137                                    |
| 168          |             | 1.92               | 2.39               | 3.076942                                    | 6.067994                                    |

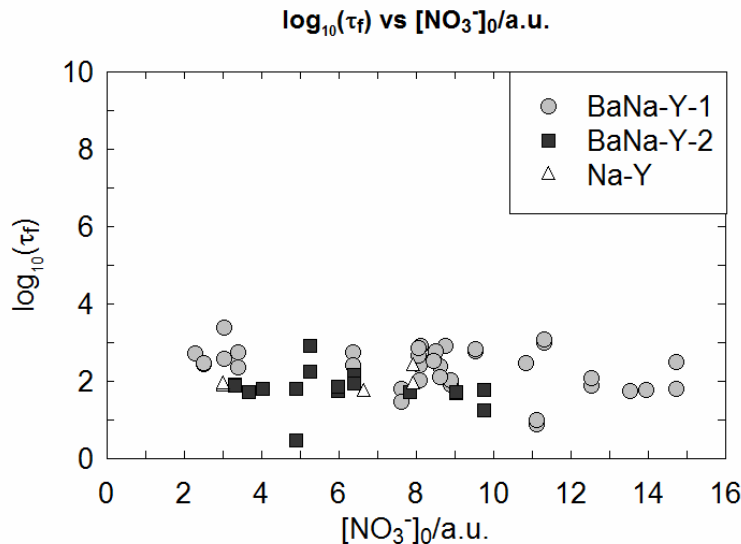

**Fig. S.8.**  $\log(\tau_f)$  vs.  $[\text{NO}_3^-]_0$  with equal scaling for the x-axis and y-axis. It is clear that  $\log(\tau_f)$  does not correlate directly with  $[\text{NO}_3^-]_0$

## V. Estimating the Activation Energy for Diffusion

The temperature dependence of the calculated diffusion coefficients was analyzed using Relation 1 of the published article, which indicates that the end-time of the Zeldovich regime,  $\tau_f$ , is inversely proportional to the diffusion coefficient. Simulations by Argyrakis et al.<sup>25</sup> have found that for a two dimensional surface, an order of magnitude estimate can be made for Rel. 1 in Table 1 of the published article, of  $\tau_f \sim (0.14)^2 L^2 / D$ . However, this estimate assumes every encounter of A and B leads to reaction ( $p_{\text{eff}}=1$ ). Thus, in an actual reaction, where  $p_{\text{eff}} < 1$ , the end-times would be expected to be longer (as discussed in the published article, Section V.C), and consequently the values we obtain for D from the above relation are expected to correspond to a lower limit for the actual value of D. As shown in Section VII of the SI, the surface area per crystallite used is  $\sim \leq 36 \text{ cm}^2$ , which we take for  $L^2$  in Rel. 1 in Table 1 of the published article.

As discussed in Section V.C of the published article,  $\tau_f$  is inversely proportional to [NO]. Thus, to obtain the lower limit for the diffusion coefficient from the experimental values of  $\tau_f$ , it was first necessary to normalize the  $\tau_f$  values by [NO]. The relationship of [NO] vs.  $\tau_f$  was fit to a power law, based on the dependence observed in the log-log plot of Figure 3 of the published article, with the result being  $\tau_f = ([NO]/(23.4 \pm 5.1))^{(-0.51 \pm 0.07)}$ , where the error bars represent the standard errors from fitting. We do not ascribe any physical significance to this functional form, we use it only for empirical scaling between [NO] and  $\tau_f$  -- which is required to compare the effective diffusion coefficient between different experiments. Using the fitted relationship above, all  $\tau_f$  values were normalized to the fitted value for  $\tau_f$  with [NO]=10 Torr. The value of 10 Torr was used as it is the highest “scale” for [NO] exposure used during experiments - - and it showed the fastest nitrate depletion rate – thus it provides our *lowest observed limit* for the effective diffusion coefficient at each temperature. From these normalized  $\tau_f$  values, the effective diffusion coefficient was calculated for each of the data points in Figure 3 using the relation  $\tau_f \sim (0.14)^2 L^2 / D$ . An Arrhenius plot was constructed from the calculated effective diffusion coefficients (Figure S.9, shown on the following page), yielding  $D_0 = 10^{6 \pm 7} \text{ cm}^2 \text{ s}^{-1}$  and  $E_a = 30 \pm 30 \text{ kJ/mol}$  where the errors represent fitting errors yielded by Origin’s standard error-weighted fit (this weights the importance of each point used in the linear regression by the inverse square of the vertical error bars associated with that point). The error bars for  $D_0$  and  $E_a$  are large due to the scatter of the data and because the temperature range where these experiments are possible sufficiently narrow (a range of <200K) to make it difficult to obtain a more precise value for  $D_0$  given the low level of precision in determining  $\tau_f$ .

As will be discussed in the next section, many of the individual data points for the diffusion coefficient (in Figure S.9) are too high to be realistic – being two orders of magnitude greater than  $10^{-2} \text{ cm}^2 \text{ s}^{-1}$ . However, all raw data points -- before scaling -- yielded diffusion coefficients of realistic orders of magnitude,  $<10^{-2} \text{ cm}^2 \text{ s}^{-1}$ . The high values for the diffusion coefficient obtained from some experiments may then be artifacts arising from the [NO] scaling procedure: the [NO] scaling function was determined empirically from data with high scatter, and thus may have resulted in inaccurate scaling, which could in turn lead to artificially high calculated diffusion coefficients. Nonetheless, the [NO] scaling procedure is necessary to obtain effective diffusion coefficients from multiple experiments due to the relationship between  $\tau_f$  and [NO] which is discussed in Section V.C of the published article.

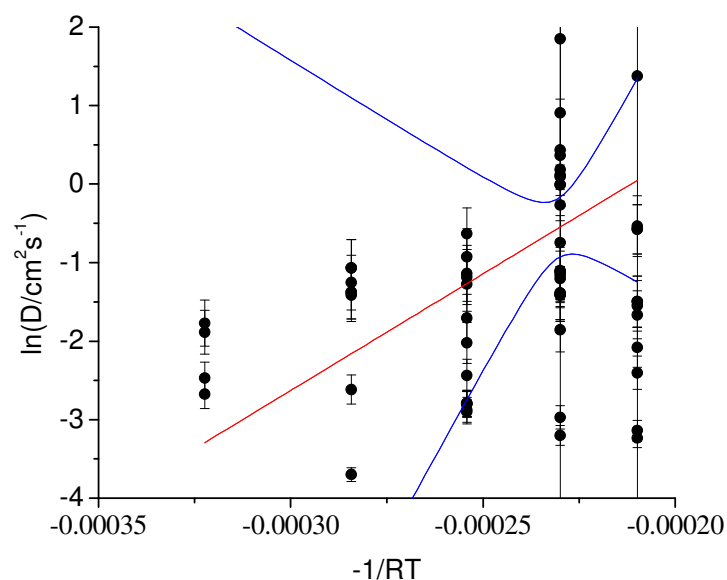

**Figure S.9** Arrhenius plot for diffusion coefficients obtained from normalized  $\tau_f$  values for each experiment.  $\tau_f$  values were scaled to the fitted value of  $\tau_f$  for [NO]=10 Torr.

## VI. Discussion of the Values Obtained for the Diffusion Coefficient

Using the procedure outlined in the previous section it was determined that,  $D_0 = 10^{6 \pm 7} \text{ cm}^2 \text{ s}^{-1}$  and  $E_a = 30 \pm 30 \text{ kJ/mol}$ . As described in section III.C of the published article the value obtained for the activation energy is, as expected, near the lower end of the range for the activation energies for the hopping of acidic protons in zeolites,. However, as discussed below, the correlation between the value for  $D_0$  obtained from these experiments and a specific physical process is not clear.

The value obtained for  $D_0$  is higher than would be expected for an atom or molecule diffusing on a surface, as  $D_0$  for such processes on surfaces is typically  $10^{-2}$  to  $10^{-3} \text{ cm}^2 \text{ s}^{-1}$ .<sup>26,27,28</sup> However, a possible explanation for the high value of  $D_0$  obtained might be found in the mechanism for proton migration in zeolites. The low activation energy route for proton migration in zeolites arises from several parallel mechanisms for water-assisted proton-migration.<sup>29-31</sup> Thus, proton migration in our study is not expected to involve only a single elementary process and, therefore, the diffusion coefficient would not be expected to be accurately described by an Arrhenius equation over a wide temperature range: Different mechanisms could dominate as the temperature changes over a sufficiently wide range. Consequently, it is not surprising that our extrapolation to obtain  $D_0$  from an Arrhenius plot does not yield a realistic pre-exponential for the intrinsic diffusion coefficient. Our extrapolation instead yields the effective pre-exponential for an empirically observed mass-transfer diffusion coefficient. While this is the most likely explanation for the high  $D_0$  observed, we will also note other plausible explanations below.

A second plausible explanation is that if the disappearance of nitrates becomes rate-limited by the depletion of the less reactive nitrates *prior* to the occurrence of finite size effects<sup>25,32</sup> (i.e., before the “natural” end of the Zeldovich regime) – then the end-time obtained from the fitting procedure would be shorter than that predicted by theory, leading to a larger than expected diffusion coefficient --as observed. This would be a qualitative deviation from the ideal case of the DLAB0 model, as the end-time for the Zeldovich regime would arise from a different kinetic process than expected for a DLAB0 model (i.e., a different rate limiting step). Alternatively, the high value of  $D_0$  may be a result of deviations from the ideal case of the DLAB0 limited model which are minor enough to still retain the essence of the model in terms of the qualitative aspects of kinetics that are observed. Such deviations could arise from a variety of possible deviations from the ideal model. These include: multiple types of nitrates with differing stability,<sup>33</sup> regions of the surface that have different dimensionality, non-random initial conditions,<sup>33,34</sup> a  $p_{\text{eff}} < 1$ , unusual lattice symmetry, crystal inhomogeneities and deviations from true random-walk behaviour (such as due to particle interactions)<sup>35</sup>. All of these factors could potentially affect the growth of the segregated reactant regions and/or the proportionality constant of Rel. 1 in Table 1 of the published article (currently assumed to be  $(0.14)^2$ ) -- and thus change the observed end-times (and consequently the estimated diffusion coefficient). Modifications of the current model are necessary to treat such effects and a more in depth understanding of the interplay among such effects could come from additional theoretical studies, especially given the difficulty in finding experimental systems that cleanly exhibit DLAB0 kinetics.<sup>33</sup>

## VII. Estimation of Crystallite Surface Area

With knowledge of the crystallite size, it is possible to calculate the total surface area per zeolite crystallite. As mentioned earlier, the Na and Ba cations are small compared to the size of the zeolite supercages. Thus, the change in surface area between Na-Y and BaNa-Y crystallites would not be expected to be large. According to the supplier's specifications sheet (-100 mesh), the zeolite crystallites were  $\leq 3.5 \times 10^{-6} \text{ cm}^3$  for >90% of the crystals. Na-Y has a cubic crystal structure, with a crystallographic unit cell side length of  $\sim 24.6 \text{ \AA}$  for the Si/Al ratios used,<sup>36,37</sup> leading to a crystallographic unit cell volume of  $\sim 15,000 \text{ \AA}^3$ . From the upper bound of the volume of the crystallites used, this gives  $\leq 2.34 \times 10^{14}$  unit cells per crystallite. The sum of the number of framework atoms (Si and Al) per unit cell is 192.<sup>38</sup> Taking the ICP obtained Si/Al ratio of 2.62 (Section II of the published article), the density of the Na-Y used in this study is  $\sim 12700$  atomic mass units per crystallographic unit cell. From the atomic mass per unit cell and the number of unit cells per crystallite, the weight per crystallite is  $\leq 4.96 \times 10^{-6} \text{ g}$ . A surface area of  $\sim 725 \text{ m}^2 \text{ g}^{-1}$  has been reported in the literature for a Na-Y zeolite with a similar Si/Al ratio as the one used in this study.<sup>39</sup> Given a surface area of  $\sim 725 \text{ m}^2 \text{ g}^{-1}$ , the surface area per crystallite is  $\leq 3.6 \times 10^{-3} \text{ m}^2$ , which is  $\leq 36 \text{ cm}^2$ .

## References:

- (1) Szanyi, J.; Kwak, J. H.; Moline, R. A.; Peden, C. H. F. *Physical Chemistry Chemical Physics* **2003**, 5, 4045.
- (2) Chao, C. C.; Lunsford, J. H. *Journal of the American Chemical Society* **1971**, 93, 71.
- (3) Szanyi, J.; Kwak, J. H.; Peden, C. H. F. *Journal of Physical Chemistry B* **2004**, 108, 3746.
- (4) Szanyi, J.; Kwak, J. H.; Burton, S.; Rodriguez, J. A.; Peden, C. H. F. *Journal of Electron Spectroscopy and Related Phenomena* **2006**, 150, 164.
- (5) Li, G. H.; Larsen, S. C.; Grassian, V. H. *Journal of Molecular Catalysis A* **2005**, 227, 25.
- (6) Li, G. H.; Jones, C. A.; Grassian, V. H.; Larsen, S. C. *Journal of Catalysis* **2005**, 234, 401.
- (7) Savara, A.; Sachtler, W. M. H.; Weitz, E. *Applied Catalysis B* **2009**, 90, 120.
- (8) Kärger, J.; Ruthven, D. M. *Diffusion in zeolites and other microporous solids*; Wiley: New York, 1992.
- (9) Giudici, R.; Kouwenhoven, H. W.; Prins, R. *Applied Catalysis a-General* **2000**, 203, 101.
- (10) Gola, A.; Rebours, B.; Milazzo, E.; Lynch, J.; Benazzi, E.; Lacombe, S.; Delevoye, L.; Fernandez, C. *Microporous and Mesoporous Materials* **2000**, 40, 73.
- (11) Yoshida, A.; Nakamoto, H.; Okanishi, K.; Tsuru, T.; Takahashi, H. *Bulletin of the Chemical Society of Japan* **1982**, 55, 581.
- (12) Lima, E. J.; Bosch, P.; Lara, V. H.; Bulbulian, S. *Chemistry of Materials* **2004**, 16, 2255.
- (13) Erdem-Senatalar, A.; Tatlier, M. *Chaos Solitons & Fractals* **2000**, 11, 953.
- (14) Zhdanov, V. P.; Pavlicek, J.; Knor, Z. *Catalysis Reviews-Science and Engineering* **1988**, 30, 501.
- (15) Lombardo, S. J.; Bell, A. T. *Surface Science Reports* **1991**, 13, 1.
- (16) Yeom, Y. H.; Henao, J.; Li, M. J.; Sachtler, W. M. H.; Weitz, E. *Journal of Catalysis* **2005**, 231, 181.
- (17) Savara, A.; Sachtler, W. M. H.; Weitz, E. *Applied Catalysis B* **2008**, Submitted.
- (18) Foley, N. J.; Thomas, K. M.; Forshaw, P. L.; Stanton, D.; Norman, P. R. *Langmuir* **1997**, 13, 2083.
- (19) Savara, A.; Weitz, E. *Abstracts of Papers of the American Chemical Society* **2006**, 231.
- (20) Taylor, J. L.; Weinberg, W. H. *Surface Science* **1978**, 78, 259.
- (21) Masel, R. I. *Principles of adsorption and reaction on solid surfaces*; Wiley: New York, 1996.
- (22) King, D. A.; Madey, T. E.; Yates, J. T. *Journal of Chemical Physics* **1971**, 55, 3236.
- (23) *SigmaPlot 5.0 : programming guide*; SPSS Inc.: Chicago, Illinois, 1998.
- (24) Takezawa, K. *Introduction to nonparametric regression*; Wiley-Interscience: Hoboken NJ, 2006.

- (25) Argyrakis, P.; Kopelman, R.; Lindenberg, K. *Chemical Physics* **1993**, *177*, 693.
- (26) Seebauer, E. G.; Allen, C. E. *Progress in Surface Science* **1995**, *49*, 265.
- (27) Wang, X. R.; Xiao, X. D.; Zhang, Z. Y. *Surface Science* **2002**, *512*, L361.
- (28) Karl J. Sladek, E. R. G., Raymond F. Baddour. *Industrial & Engineering Chemistry Fundamentals* **1974** *13*, 100.
- (29) Ryder, J. A.; Chakraborty, A. K.; Bell, A. T. *Journal of Physical Chemistry B* **2000**, *104*, 6998.
- (30) Ernsberger, F. M. *Journal of the American Ceramic Society* **1983**, *66*, 747.
- (31) Martucci, A.; Parodi, I.; Simoncic, P.; Armbruster, T.; Alberti, A. *Microporous and Mesoporous Materials* **2009**, *123*, 15.
- (32) Lin, A.; Kopelman, R.; Argyrakis, P. *Physical Review E* **1996**, *53*, 1502.
- (33) Monson, E.; Kopelman, R. *Physical Review E* **2004**, *69*, 021103.
- (34) Sancho, J. M.; Romero, A. H.; Lindenberg, K.; Sagues, F.; Reigada, R.; Lacasta, A. M. *Journal of Physical Chemistry* **1996**, *100*, 19066.
- (35) Oshanin, G.; Sokolov, I. M.; Argyrakis, P.; Blumen, A. *Journal of Chemical Physics* **1996**, *105*, 6304.
- (36) Dempsey, W.; Kuhl, G. H.; Olson, D. H. *Journal of Physical Chemistry* **1969**, *73*, 387.
- (37) Hriljac, J. A.; Eddy, M. M.; Cheetham, A. K.; Donohue, J. A.; Ray, G. J. *Journal of Solid State Chemistry* **1993**, *106*, 66.
- (38) Yeom, Y. H.; Jang, S. B.; Kim, Y.; Song, S. H.; Seff, K. *Journal of Physical Chemistry B* **1997**, *101*, 6914.
- (39) Langmi, H. W.; Walton, A.; Al-Mamouri, M. M.; Johnson, S. R.; Book, D.; Speight, J. D.; Edwards, P. P.; Gameson, I.; Anderson, P. A.; Harris, I. R. *Journal of Alloys and Compounds* **2003**, *356*, 710.

**Appendix S.1:** Parameters obtained from first and second-order fits  
**Table S.4a** First-order parameters from fitting to Eqs. 4 & 5, “full nitrate peak”

| Experiment # | $k_{\text{ObsA}}$ | $[(\text{NO}_3^-)_A]_0$ | $k_{\text{ObsB}}$ | $[(\text{NO}_3^-)_B]_0$ | $[(\text{NO}_3^-)_U]_0$ |
|--------------|-------------------|-------------------------|-------------------|-------------------------|-------------------------|
| 16           | 0.0067            | 2.1825                  |                   |                         | 5.9656                  |
| 17           | 0.0055            | 1.834                   |                   |                         | 6.4968                  |
| 18           | 0.0057            | 0.587                   |                   |                         | 7.8843                  |
| 19           | 0.0048            | 0.5572                  |                   |                         | 8.1156                  |
| 21           | 0.0049            | 1.7704                  |                   |                         | 6.3269                  |
| 22b          | 0.0032            | 1.4933                  |                   |                         | 6.5145                  |
| 22f          | 0.0024            | 1.2369                  |                   |                         | 5.1195                  |
| 30           | 0.0066            | 0.425                   |                   |                         | 4.8015                  |
| 22c          | 0.0063            | 0.9141                  |                   |                         | 10.5356                 |
| 22e          | 0.0047            | 0.703                   |                   |                         | 8.8557                  |
| 22d          | 0.0092            | 1.1651                  |                   |                         | 9.4498                  |
| 60           | 0.0685            | 5.3464                  | 0.0049            | 0.5914                  | 8.5674                  |
| 61           | 0.0496            | 5.2017                  |                   |                         | 8.0119                  |
| 62           | 0.8849            | 2.7903                  | 0.0361            | 3.5179                  | 7.5147                  |
| 73           | 0.5743            | 2.7431                  | 0.023             | 0.7108                  | 8.1319                  |
| 74           | 0.0042            | 0.403                   |                   |                         | 7.6725                  |
| 75           | 0.0575            | 0.5539                  | 0.0072            | 0.7132                  | 7.6378                  |
| 77           | 0.0122            | 0.1027                  | 0.012             | 0.1217                  | 2.2591                  |
| 79           | 0.0098            | 0.0448                  | 0.0012            | 0.1184                  | 0                       |
| 80           | 0.0034            | 0.8391                  | 0.0001            | -0.7257                 | 3.1808                  |
| 63           | 0.0401            | 2.0996                  |                   |                         | 10.6075                 |
| 71           | 0.0058            | 0.3815                  | 0.0008            | 0.9762                  | 1.4847                  |
| 72           | 1.3808            | 0.1101                  | 0.043             | 0.054                   | 0.6155                  |
| 153          | 0.1627            | 1.1413                  | 0.0028            | 0.8581                  | 2.3263                  |
| 154          | 0.0011            | 0.3838                  | 0.0718            | 0.8736                  | 2.0557                  |
| 155          | 0.22              | 4.9697                  | 0.0015            | 0.9159                  | 4.5557                  |
| 158          | 0.084             | 1.2153                  | 0.0139            | 0.3862                  | 2.4361                  |
| 159          | 0.0746            | 3.3324                  |                   |                         | 5.3781                  |
| 160          | 0.0696            | 1.6535                  | 0.0043            | 0.1327                  | 1.9224                  |
| 165          | 0.1021            | 0.635                   | 0.0025            | 0.3763                  | 4.8672                  |
| 161          | 0.0341            | 1.0553                  | 0.0017            | 0.6036                  | 4.6859                  |
| 162          | 0.1327            | 2.5769                  | 0.0027            | 0.845                   | 4.8799                  |
| 163          | 0.0234            | 0.1921                  | 0.0021            | 0.3249                  | 4.6423                  |
| 166          | 0.0321            | 0.6012                  | 0.0005            | 1.0843                  | 2.9495                  |
| 167          | 0.9599            | 4.1862                  | 0.0438            | 4.0392                  | 3.2369                  |
| 168          | 3.4797            | 22.5196                 | 0.039             | 5.32                    | 3.3723                  |

**Table S.4b** First-order parameters from fitting to Eqs. 4 & 5, “right nitrate peak”

| Experiment # | $k_{\text{ObsA}}$ | $[(\text{NO}_3^-)_\text{A}]_0$ | $k_{\text{ObsB}}$ | $[(\text{NO}_3^-)_\text{B}]_0$ | $[(\text{NO}_3^-)_\text{U}]_0$ |
|--------------|-------------------|--------------------------------|-------------------|--------------------------------|--------------------------------|
| 16           | 0.0055            | 0.2173                         |                   |                                | 0.8356                         |
| 17           | 0.0055            | 0.1957                         |                   |                                | 0.7214                         |
| 18           |                   |                                |                   |                                |                                |
| 19           | 0.0033            | 0.1129                         |                   |                                | 0.8126                         |
| 21           | 0.0043            | 0.1369                         |                   |                                | 0.7416                         |
| 22b          | 0.0061            | 0.224                          |                   |                                | 0.6815                         |
| 22f          | 0.0033            | 0.1173                         |                   |                                | 0.476                          |
| 30           | 0.0159            | 0.0858                         |                   |                                | 0.646                          |
| 22c          | 0.0038            | 0.0923                         |                   |                                | 1.0789                         |
| 22e          | 0.0048            | 0.0466                         |                   |                                | 1.0212                         |
| 22d          | 0.0081            | 0.162                          |                   |                                | 0.8902                         |
| 60           | 0.071             | 0.2515                         | 0.0039            | 0.1432                         | 1.3924                         |
| 61           | 0.0496            | 5.2017                         |                   |                                | 8.0119                         |
| 62           | 0.8016            | 0.6027                         | 0.013             | 0.1469                         | 0.7968                         |
| 73           |                   |                                |                   |                                |                                |
| 74           | 0.8948            | 0.1328                         | 0.0048            | 0.1429                         | 0.714                          |
| 75           | 0.6476            | 0.2239                         | 0.0238            | 0.13                           | 0.5263                         |
| 77           | 0.1291            | 0.0617                         | 0.006             | 0.1022                         | 0.2409                         |
| 79           | 0.0098            | 0.0448                         | 0.0012            | 0.1184                         | 0                              |
| 80           | 0.0022            | 0.1428                         | 0.0003            | 0.0541                         | 0.0577                         |
| 63           | 1.3145            | 1.1298                         |                   |                                | 0.914                          |
| 71           | 0.0113            | 0.039                          | 0.001             | 0.1084                         | 0.0891                         |
| 72           | 1.3808            | 0.1101                         | 0.043             | 0.054                          | 0.6155                         |
| 153          | 0.8044            | 0.191                          | 0.0033            | 0.0936                         | 0.3181                         |
| 154          | 0.0997            | 0.0969                         | 0.0011            | 0.035                          | 0.2134                         |
| 155          | 0.2058            | 0.5502                         | 0.0015            | 0.1299                         | 0.5294                         |
| 158          | 0.0605            | 0.1244                         | 0.0031            | 0.0275                         | 0.3192                         |
| 159          | 0.0713            | 0.2789                         | 0.0001            | 0.2224                         | 0.3915                         |
| 160          | 0.0541            | 0.129                          | 0.0034            | 0.018                          | 0.1536                         |
| 165          | 0.077             | 0.0475                         | 0.0011            | 0.0433                         | 0.564                          |
| 161          | 0.0322            | 0.0741                         | 0.0009            | 0.0588                         | 0.388                          |
| 162          | 0.1102            | 0.1413                         | 0.0016            | 0.0601                         | 0.4368                         |
| 163          | 0.0221            | 0.0216                         | 0                 | 0.219                          | 0.3388                         |
| 166          |                   |                                |                   |                                |                                |
| 167          |                   |                                |                   |                                |                                |
| 168          |                   |                                |                   |                                |                                |

**Table S.4c.** First-order  $k_{\text{obsA}}$  from half-Life analysis, “full peak” & “right peak”

| Experiment # | $k_{\text{obsA}}$ “full peak” | $k_{\text{obsA}}$ “right peak” |
|--------------|-------------------------------|--------------------------------|
| 16           | 0.010756                      | 0.006841                       |
| 17           | 0.0059                        | 0.005741                       |
| 18           | 0.005636                      |                                |
| 19           | 0.004633                      | 0.004816                       |
| 21           | 0.004648                      | 0.004408                       |
| 22b          | 0.003322                      | 0.005693                       |
| 22f          | 0.002185                      | 0.003233                       |
| 30           | 0.066774                      | 0.008312                       |
| 22c          | 0.004503                      | 0.004077                       |
| 22e          | 0.004722                      | 0.004977                       |
| 22d          | 0.005876                      | 0.006329                       |
| 60           | 0.059429                      | 0.047377                       |
| 61           | 0.05839                       | 0.065568                       |
| 62           | 0.047007                      | 0.019804                       |
| 73           | 0.4658                        |                                |
| 74           | 0.006361                      | 0.012853                       |
| 75           | 0.025269                      | 0.693147                       |
| 77           | 0.012361                      | 0.0168                         |
| 79           | 0.012504                      | 0.001995                       |
| 80           | 0.005203                      | 0.001473                       |
| 63           | 0.049511                      | 0.077016                       |
| 71           | 0.002108                      | 0.002442                       |
| 72           | 0.075234                      | 0.214511                       |
| 153          | 0.138629                      | 0.346574                       |
| 154          | 0.048397                      | 0.067152                       |
| 155          | 0.1299                        | 0.125798                       |
| 158          | 0.056289                      | 0.061054                       |
| 159          | 0.073403                      | 0.049012                       |
| 160          | 0.061865                      | 0.021517                       |
| 165          | 0.053502                      | 0.040463                       |
| 161          | 0.022137                      | 0.034657                       |
| 162          | 0.098481                      | 0.058649                       |
| 163          | 0.004016                      | 0.00063                        |
| 166          | 0.004326                      |                                |
| 167          | 0.141339                      |                                |
| 168          | 0.088776                      |                                |

**Table S.4d** Second-order parameters from fitting to Eqs. 4 & 5, “full nitrate peak”

| Experiment # | $k_{\text{ObsA}}$ | $[(\text{NO}_3^-)_\text{A}]_0$ | $[(\text{NO}_3^-)_\text{U}]_0$ |
|--------------|-------------------|--------------------------------|--------------------------------|
| 16           | 0.0044            | 2.599428                       | 5.7623                         |
| 17           | 0.0034            | 2.229654                       | 6.2226                         |
| 18           | 0.0115            | 0.738225                       | 7.7969                         |
| 19           | 0.0065            | 0.719994                       | 7.9599                         |
| 21           | 0.0033            | 2.148228                       | 6.0815                         |
| 22b          | 0.0014            | 2.05846                        | 5.9822                         |
| 22f          | 0.0019            | 1.530925                       | 4.8894                         |
| 30           | 0.0229            | 0.672179                       | 4.7468                         |
| 22c          | 0.0072            | 1.090394                       | 10.3905                        |
| 22e          | 0.0039            | 0.983768                       | 8.5835                         |
| 22d          | 0.0121            | 1.376273                       | 9.3724                         |
| 60           | 0.0184            | 6.69344                        | 8.4802                         |
| 61           | 0.0053            | 7.473842                       | 5.8122                         |
| 62           | 0.0176            | 5.102041                       | 7.2212                         |
| 73           | 0.1614            | 3.234153                       | 8.2008                         |
| 74           | 0.0072            | 0.332557                       | 7.7276                         |
| 75           | 0.0211            | 1.258336                       | 7.6226                         |
| 77           | 0.0342            | 0.298445                       | 2.1865                         |
| 79           | 0.0421            | 0.226572                       | 2.0828                         |
| 80           | 0.0066            | 0.884799                       | 2.4618                         |
| 63           | 0.014             | 2.862869                       | 9.9433                         |
| 71           | 0.0014            | 1.383892                       | 1.4535                         |
| 72           | 0.0763            | 1.196602                       | 6.3834                         |
| 153          | 0.0214            | 1.39821                        | 2.439                          |
| 154          | 0.0781            | 1.099989                       | 2.2489                         |
| 155          | 0.0602            | 6.153846                       | 4.9074                         |
| 158          | 0.0623            | 1.807011                       | 2.3983                         |
| 159          | 0.0409            | 4.253509                       | 5.2027                         |
| 160          | 0.0654            | 0.860289                       | 4.9427                         |
| 165          | 0.0635            | 2.110595                       | 1.8764                         |
| 161          | 0.0154            | 1.576044                       | 4.7492                         |
| 162          | 0.0407            | 3.206156                       | 5.0744                         |
| 163          | 0.0128            | 0.512426                       | 4.6222                         |
| 166          | 0.0376            | 0.914244                       | 3.784                          |
| 167          | 0.0231            | 6.535948                       | 3.1018                         |
| 168          | 0.0123            | 7.097232                       | 3.0359                         |

**Table S.4e** Second-order parameters from fitting to Eqs. 4 & 5, “right nitrate peak”

| Experiment # | $k_{\text{ObsA}}$ | $[(\text{NO}_3^-)_\text{A}]_0$ | $[(\text{NO}_3^-)_\text{U}]_0$ | $k_{\text{ObsA}}$ Scaled* |
|--------------|-------------------|--------------------------------|--------------------------------|---------------------------|
| 16           | 0.0322            | 0.259727                       | 0.7219                         | 0.003203                  |
| 17           | 0.0313            | 0.23758                        | 0.6918                         | 0.003985                  |
| 18           |                   |                                |                                |                           |
| 19           | 0.0177            | 0.156723                       | 0.77                           | 0.001496                  |
| 21           | 0.0347            | 0.168175                       | 0.7204                         | 0.003313                  |
| 22b          | 0.6249            | 0.286262                       | 0.022                          | 0.050565                  |
| 22f          | 0.0321            | 0.14454                        | 0.4596                         | 0.003909                  |
| 30           |                   |                                |                                |                           |
| 22c          | 0.0384            | 0.114151                       | 1.0609                         | 0.004253                  |
| 22e          | 0.0855            | 0.0579                         | 1.0115                         | 0.010321                  |
| 22d          | 0.0694            | 0.189186                       | 0.8769                         | 0.008441                  |
| 60           | 0.1632            | 0.356037                       | 1.4292                         | 0.01355                   |
| 61           | 0.0964            | 0.305446                       | 0.921                          | 0.008523                  |
| 62           | 0.1893            | 0.287679                       | 0.7865                         | 0.013693                  |
| 73           |                   |                                |                                |                           |
| 74           | 0.0346            | 0.177873                       | 0.6895                         | 0.011012                  |
| 75           | 0.5552            | 0.266852                       | 0.529                          | 0.004207                  |
| 77           | 0.103             | 0.130842                       | 0.2375                         | 0.983466                  |
| 79           | 0.024             | 0.166492                       | 0                              | 0.114579                  |
| 80           | 0.01              | 0.205141                       | 0.052                          | 0.031827                  |
| 63           | 0.0259            | 0.327579                       | 0.6601                         | 0.001805                  |
| 71           | 0.0198            | 0.144527                       | 0.0892                         | 0.009453                  |
| 72           | 2.324             | 0.117849                       | 0.6148                         | 0.04438                   |
| 153          | 0.1506            | 0.121202                       | 0.3254                         | 0.00145                   |
| 154          | 1.2263            | 0.121683                       | 0.2328                         | 0.142792                  |
| 155          | 0.4384            | 0.669792                       | 0.582                          | 0.023178                  |
| 158          | 0.5158            | 0.164802                       | 0.3203                         | 0.024142                  |
| 159          | 0.3092            | 0.351667                       | 0.5722                         | 0.032301                  |
| 160          | 0.3906            | 0.066669                       | 0.577                          | 0.019629                  |
| 165          | 0.5188            | 0.164258                       | 0.1515                         | 0.025693                  |
| 161          | 0.1586            | 0.113421                       | 0.4027                         | 0.008064                  |
| 162          | 0.5072            | 0.173792                       | 0.4549                         | 0.020434                  |
| 163          | 0.2418            | 0.034638                       | 0.5422                         | 0.016491                  |
| 166          |                   |                                |                                |                           |
| 167          |                   |                                |                                |                           |
| 168          |                   |                                |                                |                           |

\* The scaled  $k_{\text{obsA}}$  is obtained by dividing  $k_{\text{obsA}}$  by 10.5, see text for details.

**Table S.4f.** Second-order  $k_{\text{obsA}}$  from half-life analysis, “full peak” & “right peak”

| Experiment # | $k_{\text{obsA}}$ “full peak” | $k_{\text{obsA}}$ “right peak” | $k_{\text{obsA}}$ “right peak” scaled* |
|--------------|-------------------------------|--------------------------------|----------------------------------------|
| 16           | 0.00571                       | 0.03787                        | 0.003616                               |
| 17           | 0.004246                      | 0.039396                       | 0.003762                               |
| 18           | 0.012054                      |                                |                                        |
| 19           | 0.009523                      | 0.044693                       | 0.004267                               |
| 21           | 0.003769                      | 0.03573                        | 0.003412                               |
| 22b          | 0.003694                      | 0.035542                       | 0.003394                               |
| 22f          | 0.002533                      | 0.033151                       | 0.003165                               |
| 30           | 0.130179                      | 0.099725                       | 0.009522                               |
| 22c          | 0.006305                      | 0.034722                       | 0.003315                               |
| 22e          | 0.011159                      | 0.134002                       | 0.012795                               |
| 22d          | 0.006338                      | 0.062846                       | 0.006001                               |
| 60           | 0.013474                      | 0.109156                       | 0.010422                               |
| 61           | 0.016538                      | 0.209689                       | 0.020022                               |
| 62           | 0.01243                       | 0.042984                       | 0.004104                               |
| 73           | 0.219404                      |                                |                                        |
| 74           | 0.021402                      | 0.080698                       | 0.007705                               |
| 75           | 0.029134                      | 2.753061                       | 0.262868                               |
| 77           | 0.073391                      | 0.170043                       | 0.016236                               |
| 79           | 0.092399                      | 0.016071                       | 0.001534                               |
| 80           | 0.008492                      | 0.010478                       | 0.001001                               |
| 63           | 0.040816                      | 0.584795                       | 0.055837                               |
| 71           | 0.002003                      | 0.022084                       | 0.002109                               |
| 72           | 0.088546                      | 2.831193                       | 0.270328                               |
| 153          | 0.076277                      | 1.699187                       | 0.162242                               |
| 154          | 0.052501                      | 0.618294                       | 0.059036                               |
| 155          | 0.034606                      | 0.270245                       | 0.025804                               |
| 158          | 0.049186                      | 0.481904                       | 0.046013                               |
| 159          | 0.025884                      | 0.191202                       | 0.018256                               |
| 160          | 0.079449                      | 0.318383                       | 0.0304                                 |
| 165          | 0.0443                        | 0.40427                        | 0.038601                               |
| 161          | 0.018333                      | 0.26095                        | 0.024916                               |
| 162          | 0.036572                      | 0.416322                       | 0.039751                               |
| 163          | 0.007857                      | 0.011319                       | 0.001081                               |
| 166          | 0.003457                      |                                |                                        |
| 167          | 0.026435                      |                                |                                        |
| 168          | 0.012404                      |                                |                                        |

\* The scaled  $k_{\text{obsA}}$  is obtained by dividing  $k_{\text{obsA}}$  by 10.5, see text for details.

## Appendix S.2: Programs used in spline-fitting alpha plots.

Program nt2. Example command: `python nt2.py -s 0.01 -i 0.5 -f 16.csv -o 16nt2.csv`

#finds the rolling slope w/ points evenly distributed across time after

```
import sys
```

```
import getopt
```

```
import math
```

```
class Point:
```

```
    def __init__(self, line, xp, yp):
```

```
        self.line = line
```

```
        self.x = xp
```

```
        self.y = yp
```

```
        self.xs = str(self.x)
```

```
        self.ys = str(self.y)
```

```
def findYintercept(points, slope):
```

```
    """ return the y-intercept
```

```
        yintercept = Avg(y) - slope*Avg(x)
```

```
    """
```

```
    n = len(points)
```

```
    avgx = 0
```

```
    avgy = 0
```

```
    for i in points:
```

```
        avgx = avgx + i.x
```

```
        avgy = avgy + i.y
```

```
    avgx = avgx / n
```

```

    avgy = avgy / n

    yintercept = avgy - (slope * avgx)

    #print " ".join([point.xs + ", " + point.ys for point in points])

    #print "Avgx: " + str(avgx) + "   Avgy: " + str(avgy) + "   Slope: " + str(slope)

    #print "yint: " + str(yintercept)

    #print "-----"

    return yintercept

def findslope(points):
    """ returns the slope from the following

        
$$\text{slope} = \frac{n(\text{Summation}(x * y)) - \text{Summation}(x)\text{Summation}(y)}{n(\text{Summation}(x^{**2})) - (\text{Summation}(x))^{**2}}$$


    """
    n = len(points)

    crossSum = 0          # Summation(x * y)
    xSum = 0              # Summation(x)
    ySum = 0              # Summation(y)
    xsquareSum = 0        # Summation(x**2)

    for i in points:
        crossSum = crossSum + (i.x * i.y)
        xSum = xSum + i.x

```

```

        ySum = ySum + i.y
        xsquareSum = xsquareSum + pow(i.x,2)

    #print " ".join([point.xs + ", " + point.ys for point in points])

    slope = ( (n * crossSum) - (xSum * ySum) ) / ( (n * xsquareSum) - pow(xSum,2) )

    #print slope
    #print ""
    return slope

def printOutput(outfile, lines):
    delim = ","

    toprint = []
    toprint.append( delim.join(["LogTime", "Slope", "Y-Intercept"]) )
    for i in lines:
        toprint.append( delim.join([str(i[0]), str(i[1]), str(i[2])]) )

    if outfile == "":
        for line in toprint:
            print line
    else:
        file = open(outfile, "w")
        for line in toprint:
            file.write(line + "\n")
        file.close()

```

```

def main(argv):

    filename = ""

    fitsize = 0

    outfile = "outDefault.txt"

    FirstPoint = 0

    extraPoints = 3

    try:

        opts, args = getopt.getopt(argv, "f:i:s:o:", ["file=", "interval=", "step=", "output="])

    except getopt.GetoptError:

        usage()

        sys.exit(2)

    for opt, arg in opts:

        if opt in ("-f", "--file"):

            filename = arg

        elif opt in ("-i", "--interval"):

            interval = float(arg)

        elif opt in ("-s", "--step"):

            step = float(arg)

        elif opt in ("-o", "--output"):

            outfile = arg

        else:

            print "You need to specify an option"

            sys.exit()

```

```

file = open(filename)

lines = file.readlines()


data = []

output = []


for index, line in enumerate(lines):

    line = line.rstrip("\n")

    pointsText = line.split(",")

    #pointsFloat = [float(pointsText[0]), float(pointsText[1])]

    data.append(Point(index, float(pointsText[0]), float(pointsText[1])))


CurrentTimeMin = 0 - (interval/2)

CurrentTimeMax = CurrentTimeMin + interval

#first time range centers around 0


while extraPoints > 1:

    FirstPoint = 0

    fitsize = 0

    extraPointCounter = 0

    #FirstPoint & fitsize start at zero, and are reset with every iteration

    for index, point in enumerate(data):

        if data[index].x < CurrentTimeMin:

            FirstPoint = FirstPoint + 1

            #The starting of the linear fit will be increased by 1 point for every
point before it.

        if data[index].x < CurrentTimeMax:

            if data[index].x > CurrentTimeMin:

```

```

        fitsize = fitsize + 1

    if data[index].x == CurrentTimeMax:

        if data[index].x > CurrentTimeMin:

            fitsize = fitsize + 1

            #if the point is in the range, then the fitsize is increased by 1 -
indicating that a point is added.

        if data[index].x > CurrentTimeMax - (interval/2):

            extraPointCounter = extraPointCounter + 1

            #the above finds the correct fitsize when starting at first point,
and then adds 1 for every point

            #so if only 2 points were in the first interval, it would go from
fitsize = 0 to fitsize = 2

        #after finding the fitsize, the program has to find the slope & y-intercept and add them to
the output array

        if fitsize > 1:

            slope = findslope(data[FirstPoint:FirstPoint+fitsize])

            yintercept = findYintercept(data[FirstPoint:FirstPoint+fitsize],slope)

            CurrentTime = CurrentTimeMin + interval/2

            output.append([CurrentTime, slope, yintercept,])

            #only find slope etc. if there are enough points

            CurrentTimeMin = CurrentTimeMin + step

            CurrentTimeMax = CurrentTimeMin + interval

            #now the min and max for the time interval being looked at are increased by the step.

            extraPoints = extraPointCounter

            #then the program has to loop back to searching in every point w/in
new interval,

            #unless the extraPointCounter is not greater than 1, which is checked
here.

```

```
printOutput(outfile, output)
```

```
if __name__ == "__main__":
```

```
    main(sys.argv[1:])
```

Program ntf7 Example command:

```
python ntf7.py -s 0.01 -i 0.5 -f 16.csv -o 16ntf7.csv -g 1.85
```

```
#finds the range of the linear region, assuming slope 0.5
```

```
#includes having to provide a guess of the middle of the range, and an initial interval size,
```

```
#Based on next points (via interval) having to be w/in 2 local linear fit ResidualStDev of range's fit
```

```
#has new "Final Max" and "Final Min" functions.
```

```
#("Final Max" & Min are when total residuals double so fit starts getting really bad.)
```

```
import sys
```

```
import getopt
```

```
import math
```

```
class Point:
```

```
    def __init__(self, line, xp, yp):
```

```
        self.line = line
```

```
        self.x = xp
```

```
        self.y = yp
```

```
        self.xs = str(self.x)
```

```
        self.ys = str(self.y)
```

```
def findYintercept(points, slope):
```

```
    """ return the y-intercept
```

```
        yintercept = Avg(y) - slope*Avg(x)
```

```
    """
```

```
    n = len(points)
```

```
    avgx = 0
```

```

    avgy = 0

    for i in points:

        avgx = avgx + i.x

        avgy = avgy + i.y

    avgx = avgx / n

    avgy = avgy / n

    yintercept = avgy - (slope * avgx)

    #print " ".join([point.xs + ", " + point.ys for point in points])

    #print "Avgx: " + str(avgx) + "  Avgy: " + str(avgy) + "  Slope: " + str(slope)

    #print "yint: " + str(yintercept)

    #print "-----"

    return yintercept

def findslope(points):

    """ returns the slope from the following

        
$$\text{slope} = \frac{n(\text{Summation}(x * y)) - \text{Summation}(x)\text{Summation}(y)}{n(\text{Summation}(x^{**2})) - (\text{Summation}(x))^{**2}}$$


        """

    n = len(points)

    crossSum = 0          # Summation(x * y)

    xSum = 0              # Summation(x)

```

```

ySum = 0                                # Summation(y)

xsquareSum = 0                          # Summation(x**2)

for i in points:

    crossSum = crossSum + (i.x * i.y)

    xSum = xSum + i.x

    ySum = ySum + i.y

    xsquareSum = xsquareSum + pow(i.x,2)


#print " ".join([point.xs + ", " + point.ys for point in points])

slope = ( (n * crossSum) - (xSum * ySum) ) / ( (n * xsquareSum) - pow(xSum,2) )


#print slope

#print ""

return slope


def findCorrelation(points):

    """ returns the correlation of the best fit line

    """

    n = len(points)

    crossSum = 0                        # Summation(x * y)

    xSum = 0                            # Summation(x)

    ySum = 0                            # Summation(y)

    xsquareSum = 0                      # Summation(x**2)

    xVariance = 0

    yVariance = 0

    for i in points:

        crossSum = crossSum + ( i.x * i.y )

        xSum = xSum + i.x

```

```
ySum = ySum + i.y
```

```
#Note: below, xSum/n is just the average of x. Same for y.
```

```
for i in points:
```

```
    xVariance = xVariance + ( i.x - xSum/n )**2
```

```
    yVariance = yVariance + ( i.y - ySum/n )**2
```

```
    CrossVariance = ( i.x - xSum/n)*( i.y - ySum/n)
```

```
correlation = (CrossVariance**2/(xVariance*yVariance))**0.5
```

```
return correlation
```

```
def findResidualStDev(points, slope, yintercept):
```

```
    """ returns the correlation of the best fit line
```

```
    """
```

```
    n = len(points)
```

```
    crossSum = 0                # Summation(x * y)
```

```
    xSum = 0                    # Summation(x)
```

```
    ySum = 0                    # Summation(y)
```

```
    xsquareSum = 0              # Summation(x**2)
```

```
    yResidualSumSq = 0.0
```

```
    #Below finds the sum of the y residuals, necessary to find the standard deviation of the residuals.
```

```
    #the "average" value is the predicted point of the line, given by slope*x + b, or
```

```
    slope*i.x+yintercept
```

```
    #the squaring and square rooting is to get the absolute value.
```

```
    for i in points:
```

```
        yResidualSumSq = yResidualSumSq + (i.y - (slope*i.x + yintercept))**2
```

```
    ResidualStDev = (yResidualSumSq/(n-1))**0.5
```

```
    return ResidualStDev
```

```

def checkInterval(IntervalPoints, LocalResidualStDev,slope,yintercept):

    """ checks the points given versus the line fed,

        fits the interval to a linear fit, and assumes at least 1 point of the interval must be within

        2 ResidualStDev of the local area.

    """

    Counter=1

    for i in IntervalPoints:

        if 2*LocalResidualStDev > ((i.y - (slope*i.x + yintercept))**2)**0.5:

            Counter = 0

    #If any of the interval's points have residuals within 2 local Standard Deviations of the fed line
    (line to compare)

    #the Counter will be set to 0 (indicating that the interval is okay).

    return Counter


def printOutput(outfile, lines):

    delim = ","

    toprint = []

    toprint.append( delim.join(["Onset", "Endset", "slope", "Y-Intercept", "StDev", "R^2" ]) )

    for i in lines:

        toprint.append( delim.join([str(i[0]), str(i[1]), str(i[2]),str(i[3]), str(i[4]), str(i[5]))] ) )

    if outfile == "":

        for line in toprint:

            print line

    else:

        file = open(outfile, "w")

```

```

    for line in toprint:

        file.write(line + "\n")

    file.close()

```

```

def main(argv):

    filename = ""

    fitsize = 0

    outfile = "outDefault.txt"

    FirstPoint = 0

    extraPoints = 3

    PointsToCheck = 5

    #EndMax and EndMin are counters, when they reach 1, the extrapoint counter will be turned off
    for that end.

    EndMax = 0

    EndMin = 0

    try:

        opts, args = getopt.getopt(argv, "f:g:i:s:o:",
["file=", "guess=", "interval=", "step=", "output="])

        except getopt.GetoptError:

            usage()

            sys.exit(2)

    for opt, arg in opts:

        if opt in ("-f", "--file"):

            filename = arg

```

```

elif opt in ("-i", "--interval"):
    interval = float(arg)

elif opt in ("-g", "--guess"):
    guess = float(arg)

elif opt in ("-s", "--step"):
    step = float(arg)

elif opt in ("-o", "--output"):
    outfile = arg

else:
    print "You need to specify an option"
    sys.exit()

```

```

file = open(filename)

```

```

lines = file.readlines()

```

```

data = []

```

```

output = []

```

```

for index, line in enumerate(lines):

```

```

    line = line.rstrip("\n")

```

```

    pointsText = line.split(",")

```

```

    #pointsFloat = [float(pointsText[0]), float(pointsText[1])]

```

```

    data.append(Point(index, float(pointsText[0]), float(pointsText[1])))

```

```

CurrentTimeMin = guess - (interval/2)

```

```

CurrentTimeMax = CurrentTimeMin + interval

```

```

#first time range centers around 0

```

```

while extraPoints > 0:

    FirstPoint = 0

    fitsize = 0

    extraPointCounter = 0

    PointsBeforeMin = 0

    PointsAfterMin = 0

    PointsBeforeMax = 0

    PointsAfterMax = 0

    #FirstPoint & fitsize start at zero, and are reset with every iteration

    for index, point in enumerate(data):

        if data[index].x < CurrentTimeMin:

            FirstPoint = FirstPoint + 1

            #The starting of the linear fit will be increased by 1 point for every
point before it.

            if data[index].x < CurrentTimeMax:

                if data[index].x > CurrentTimeMin:

                    fitsize = fitsize + 1

            if data[index].x == CurrentTimeMax:

                fitsize = fitsize + 1

                #if the point is in the range, then the fitsize is increased by 1 -
indicating that a point is added.

            if data[index].x > CurrentTimeMax:

                if EndMax == 0:

                    extraPointCounter = extraPointCounter + 1

            if data[index].x < CurrentTimeMin:

                if EndMin == 0:

                    extraPointCounter = extraPointCounter + 1

```

#the above finds the correct fitsize when starting at first point,  
and then adds 1 for every point

#so if only 2 points were in the first interval, it would go from  
fitsize = 0 to fitsize = 2

```
if data[index].x > CurrentTimeMin - interval/2:
```

```
    if data[index].x < CurrentTimeMin:
```

```
        PointsBeforeMin = PointsBeforeMin + 1
```

```
if data[index].x < CurrentTimeMin + interval/2:
```

```
    if data[index].x >= CurrentTimeMin:
```

```
        PointsAfterMin = PointsAfterMin + 1
```

```
if data[index].x > CurrentTimeMax - interval/2:
```

```
    if data[index].x <= CurrentTimeMax :
```

```
        PointsBeforeMax = PointsBeforeMax + 1
```

```
if data[index].x < CurrentTimeMax + interval/2:
```

```
    if data[index].x > CurrentTimeMax :
```

```
        PointsAfterMax = PointsAfterMax + 1
```

#The above counters are used to determine the ranges for fitting to check the  
upcoming ranges

#before the Min Time and after the Max Time

```
slope = 0.5
```

```
yintercept = findYintercept(data[FirstPoint:(FirstPoint+fitsize)+1],slope)
```

```
ResidualStDev = findResidualStDev(data[FirstPoint:(FirstPoint+fitsize)+1], slope,  
yintercept)
```

# for defined point ranges, upper point of range doesn't count, but if passing "points" then  
doesn't matter.

# So for the point ranges defined above, there is always an extra +1 for the upper point.

#The "Final" max and min are if the total residuals would more than double.

```
PotentialMinRange = data[FirstPoint-PointsBeforeMin:(FirstPoint+fitsize)+1]
```

```

FinalEndMin    =    2*ResidualStDev    -    findResidualStDev(PotentialMinRange,
findslope(PotentialMinRange), findYintercept(PotentialMinRange,findslope(PotentialMinRange)))

```

```

PotentialMaxRange = data[FirstPoint:(FirstPoint+fitsize+PointsAfterMax)+1]

```

```

FinalEndMax    =    2*ResidualStDev    -    findResidualStDev(PotentialMaxRange,
findslope(PotentialMaxRange), findYintercept(PotentialMaxRange,findslope(PotentialMaxRange)))

```

```

if FinalEndMax < 0:

```

```

    EndMax = 0

```

```

if FinalEndMin < 0:

```

```

    EndMin=0

```

#below checks upperpoints and lower points, then changes Min & Max accordingly  
(assuming Final Max & Min not reached)

```

if FinalEndMin > 0:

```

```

    LocalRange = data[FirstPoint-PointsBeforeMin:(FirstPoint+PointsAfterMin)+1]

```

```

    LocalResidualStDev = findResidualStDev(LocalRange, findslope(LocalRange),
findYintercept(LocalRange,findslope(LocalRange)))

```

```

    EndMin=checkInterval(data[FirstPoint-
PointsBeforeMin:(FirstPoint)+1],LocalResidualStDev, slope,yintercept)

```

```

if FinalEndMax > 0:

```

```

    LocalRange          =          data[FirstPoint+fitsize-
PointsBeforeMax:(FirstPoint+fitsize+PointsAfterMax)+1]

```

```

    LocalResidualStDev = findResidualStDev(LocalRange, findslope(LocalRange),
findYintercept(LocalRange,findslope(LocalRange)))

```

```

    EndMax=checkInterval(data[FirstPoint+fitsize:(FirstPoint+fitsize+PointsAfterMax)+1],LocalResi
dualStDev,slope,yintercept)

```

#above, the EndMax and EndMin are checked, to see if it should be increased or not (if it's not ended).

#Then, below it's either increased or not.

if EndMax == 0:

    CurrentTimeMax = CurrentTimeMax + step

if EndMin == 0:

    CurrentTimeMin = CurrentTimeMin - step

#now the min and max for the time interval being looked at are increased by the step if their next points are okay

#otherwise they have no change and the loop starts again.

UpperPointInt = data[FirstPoint-PointsBeforeMin:(FirstPoint+PointsAfterMin)+1]

LowerPointInt = data[FirstPoint+fitsize-PointsBeforeMax:(FirstPoint+fitsize+PointsAfterMax)+1]

LowerPointsResidualStDev = findResidualStDev(LowerPointInt, findslope(LowerPointInt), findYintercept(LowerPointInt,findslope(LowerPointInt)))

UpperPointsResidualStDev = findResidualStDev(UpperPointInt, findslope(UpperPointInt), findYintercept(UpperPointInt,findslope(UpperPointInt)))

correlation = findCorrelation(data[FirstPoint:(FirstPoint+fitsize)+1])

output.append([CurrentTimeMin, CurrentTimeMax, slope, yintercept, LowerPointsResidualStDev, UpperPointsResidualStDev])

extraPoints = extraPointCounter

#then the program has to loop back to searching in every point w/in new interval,

#unless the extraPointCounter is not greater than 1, which is checked here.

#The Current Time Min, fitsize & first point will be wherever they were on the final loop of above

#The correlation and range will be determined from them.

```

        output.append([CurrentTimeMin,    CurrentTimeMax,    slope,    yintercept,    ResidualStDev,
correlation])

    slope = findslope(data[FirstPoint:(FirstPoint+fitsize)+1])

    correlation = findCorrelation(data[FirstPoint:(FirstPoint+fitsize)+1])

    yintercept = findYintercept(data[FirstPoint:(FirstPoint+fitsize)+1],slope)

    ResidualStDev = findResidualStDev(data[FirstPoint:(FirstPoint+fitsize)+1], slope, yintercept)

    #the final output consists of the Onset, Endset, the slope, y-intercept, the residual's standard
deviation, and the Correlation Coeff

    output.append([CurrentTimeMin,    CurrentTimeMax,    slope,    yintercept,    ResidualStDev,
correlation])

    printOutput(outfile, output)

if __name__ == "__main__":

    main(sys.argv[1:])

```

Program ntf8. Example command:

```
python ntf8.py -s 0.01 -i 0.5 -f 16.csv -o 16ntf7.csv -g 1.85
```

#includes having to provide a guess of the middle of the range, and an initial interval size,

#Based on next points (via interval) having to be w/in 2 local linear fit ResidualStDev of range's fit

#has new "Final Max" and "Final Min" functions.

#("Final Max" & Min are when total residuals double so fit starts getting really bad.)

```
import sys
```

```
import getopt
```

```
import math
```

```
class Point:
```

```
    def __init__(self, line, xp, yp):
```

```
        self.line = line
```

```
        self.x = xp
```

```
        self.y = yp
```

```
        self.xs = str(self.x)
```

```
        self.ys = str(self.y)
```

```
def findYintercept(points, slope):
```

```
    """ return the y-intercept
```

```
        yintercept = Avg(y) - slope*Avg(x)
```

```
    """
```

```
    n = len(points)
```

```
    avgx = 0
```

```
    avgy = 0
```

```
    for i in points:
```

```

        avgx = avgx + i.x
        avgy = avgy + i.y

    avgx = avgx / n
    avgy = avgy / n

    yintercept = avgy - (slope * avgx)

    #print " ".join([point.xs + ", " + point.ys for point in points])

    #print "Avgx: " + str(avgx) + "  Avgy: " + str(avgy) + "  Slope: " + str(slope)

    #print "yint: " + str(yintercept)

    #print "-----"

    return yintercept

def findslope(points):
    """ returns the slope from the following


$$\text{slope} = \frac{n(\text{Summation}(x * y)) - \text{Summation}(x)\text{Summation}(y)}{n(\text{Summation}(x**2)) - (\text{Summation}(x))**2}$$


    """
    n = len(points)

    crossSum = 0          # Summation(x * y)

    xSum = 0               # Summation(x)

    ySum = 0               # Summation(y)

    xsquareSum = 0         # Summation(x**2)

```

```

for i in points:

    crossSum = crossSum + (i.x * i.y)

    xSum = xSum + i.x

    ySum = ySum + i.y

    xsquareSum = xsquareSum + pow(i.x,2)


#print " ".join([point.xs + ", " + point.ys for point in points])

slope = ( (n * crossSum) - (xSum * ySum) ) / ( (n * xsquareSum) - pow(xSum,2) )


#print slope

#print ""

return slope


def findCorrelation(points):

    """ returns the correlation of the best fit line

    """

    n = len(points)

    crossSum = 0          # Summation(x * y)

    xSum = 0               # Summation(x)

    ySum = 0              # Summation(y)

    xsquareSum = 0        # Summation(x**2)

    xVariance = 0

    yVariance = 0

    for i in points:

        crossSum = crossSum + ( i.x * i.y )

        xSum = xSum + i.x

        ySum = ySum + i.y

    #Note: below, xSum/n is just the average of x. Same for y.

```

```

for i in points:

    xVariance = xVariance + ( i.x - xSum/n )**2

    yVariance = yVariance + ( i.y - ySum/n )**2

    CrossVariance = ( i.x - xSum/n)*( i.y - ySum/n)

correlation = (CrossVariance**2/(xVariance*yVariance))**0.5

return correlation


def findResidualStDev(points, slope, yintercept):

    """ returns the correlation of the best fit line
    """

    n = len(points)

    crossSum = 0          # Summation(x * y)

    xSum = 0              # Summation(x)

    ySum = 0              # Summation(y)

    xsquareSum = 0        # Summation(x**2)

    yResidualSumSq = 0.0

    #Below finds the sum of the y residuals, necessary to find the standard deviation of the residuals.

    #the "average" value is the predicted point of the line, given by slope*x + b, or
    slope*i.x+yintercept

    #the squaring and square rooting is to get the absolute value.

    for i in points:

        yResidualSumSq = yResidualSumSq + (i.y - (slope*i.x + yintercept))**2

    ResidualStDev = (yResidualSumSq/(n-1))**0.5

    return ResidualStDev


def checkInterval(IntervalPoints, LocalResidualStDev,slope,yintercept):

```

```

""" checks the points given versus the line fed,

    fits the interval to a linear fit, and assumes at least 1 point of the interval must be within

    2 ResidualStDev of the local area.

"""

Counter=1

for i in IntervalPoints:

    if 2*LocalResidualStDev > ((i.y - (slope*i.x + yintercept))**2)**0.5:

        Counter = 0

    #If any of the interval's points have residuals within 2 local Standard Deviations of the fed line
(line to compare)

    #the Counter will be set to 0 (indicating that the interval is okay).

    return Counter


def printOutput(outfile, lines):

    delim = ","

    toprint = []

    toprint.append( delim.join(["Onset", "Endset", "slope", "Y-Intercept", "StDev", "R^2" ]) )

    for i in lines:

        toprint.append( delim.join([str(i[0]), str(i[1]), str(i[2]),str(i[3]), str(i[4]), str(i[5]))] ) )

    if outfile == "":

        for line in toprint:

            print line

    else:

        file = open(outfile, "w")

        for line in toprint:

            file.write(line + "\n")

```

```
file.close()
```

```
def main(argv):
```

```
    filename = ""
```

```
    fitsize = 0
```

```
    outfile = "outDefault.txt"
```

```
    FirstPoint = 0
```

```
    extraPoints = 3
```

```
    PointsToCheck = 5
```

```
    #EndMax and EndMin are counters, when they reach 1, the extrapoint counter will be turned off
```

```
    for that end.
```

```
        EndMax = 0
```

```
        EndMin = 0
```

```
    try:
```

```
        opts, args = getopt.getopt(argv, "f:g:i:s:o:",
```

```
        ["file=", "guess=", "interval=", "step=", "output="])
```

```
    except getopt.GetoptError:
```

```
        usage()
```

```
        sys.exit(2)
```

```
    for opt, arg in opts:
```

```
        if opt in ("-f", "--file"):
```

```
            filename = arg
```

```
        elif opt in ("-i", "--interval"):
```

```
            interval = float(arg)
```

```

elif opt in ("-g", "--guess"):
    guess = float(arg)

elif opt in ("-s", "--step"):
    step = float(arg)

elif opt in ("-o", "--output"):
    outfile = arg

else:
    print "You need to specify an option"
    sys.exit()

```

```

file = open(filename)
lines = file.readlines()

```

```

data = []
output = []

```

```

for index, line in enumerate(lines):
    line = line.rstrip("\n")
    pointsText = line.split(",")
    #pointsFloat = [float(pointsText[0]), float(pointsText[1])]
    data.append(Point(index, float(pointsText[0]), float(pointsText[1])))

```

```

CurrentTimeMin = guess - (interval/2)
CurrentTimeMax = CurrentTimeMin + interval
#first time range centers around 0

```

```

while extraPoints > 0:
    FirstPoint = 0

```

```

fitsize = 0

extraPointCounter = 0

PointsBeforeMin = 0

PointsAfterMin = 0

PointsBeforeMax = 0

PointsAfterMax = 0

#FirstPoint & fitsize start at zero, and are reset with every iteration

for index, point in enumerate(data):

    if data[index].x < CurrentTimeMin:

        FirstPoint = FirstPoint + 1

        #The starting of the linear fit will be increased by 1 point for every
point before it.

    if data[index].x < CurrentTimeMax:

        if data[index].x > CurrentTimeMin:

            fitsize = fitsize + 1

        if data[index].x == CurrentTimeMax:

            fitsize = fitsize + 1

            #if the point is in the range, then the fitsize is increased by 1 -
indicating that a point is added.

        if data[index].x > CurrentTimeMax:

            if EndMax == 0:

                extraPointCounter = extraPointCounter + 1

        if data[index].x < CurrentTimeMin:

            if EndMin == 0:

                extraPointCounter = extraPointCounter + 1

            #the above finds the correct fitsize when starting at first point,
and then adds 1 for every point

```

#so if only 2 points were in the first interval, it would go from  
fitsize = 0 to fitsize = 2

```

if data[index].x > CurrentTimeMin - interval/2:
    if data[index].x < CurrentTimeMin:
        PointsBeforeMin = PointsBeforeMin + 1
    if data[index].x < CurrentTimeMin + interval/2:
        if data[index].x >= CurrentTimeMin:
            PointsAfterMin = PointsAfterMin + 1
    if data[index].x > CurrentTimeMax - interval/2:
        if data[index].x <= CurrentTimeMax :
            PointsBeforeMax = PointsBeforeMax + 1
    if data[index].x < CurrentTimeMax + interval/2:
        if data[index].x > CurrentTimeMax :
            PointsAfterMax = PointsAfterMax + 1

```

#The above counters are used to determine the ranges for fitting to check the  
upcoming ranges

```

#before the Min Time and after the Max Time

slope = findslope(data[FirstPoint:(FirstPoint+fitsize)+1])
yintercept = findYintercept(data[FirstPoint:(FirstPoint+fitsize)+1],slope)
ResidualStDev = findResidualStDev(data[FirstPoint:(FirstPoint+fitsize)+1], slope,
yintercept)

# for defined point ranges, upper point of range doesn't count, but if passing "points" then
doesn't matter.

# So for the point ranges defined above, there is always an extra +1 for the upper point.

#The "Final" max and min are if the total residuals would more than double.

PotentialMinRange = data[FirstPoint-PointsBeforeMin:(FirstPoint+fitsize)+1]

FinalEndMin = 2*ResidualStDev - findResidualStDev(PotentialMinRange,
findslope(PotentialMinRange), findYintercept(PotentialMinRange,findslope(PotentialMinRange)))

```

```

PotentialMaxRange = data[FirstPoint:(FirstPoint+fitsize+PointsAfterMax)+1]

FinalEndMax    =    2*ResidualStDev    -    findResidualStDev(PotentialMaxRange,
findslope(PotentialMaxRange), findYintercept(PotentialMaxRange,findslope(PotentialMaxRange)))

```

```

if FinalEndMax < 0:

```

```

    EndMax = 0

```

```

if FinalEndMin < 0:

```

```

    EndMin=0

```

#below checks upperpoints and lower points, then changes Min & Max accordingly  
(assuming Final Max & Min not reached)

```

if FinalEndMin > 0:

```

```

    LocalRange = data[FirstPoint-PointsBeforeMin:(FirstPoint+PointsAfterMin)+1]

```

```

    LocalResidualStDev = findResidualStDev(LocalRange, findslope(LocalRange),
findYintercept(LocalRange,findslope(LocalRange)))

```

```

    EndMin=checkInterval(data[FirstPoint-
PointsBeforeMin:(FirstPoint)+1],LocalResidualStDev, slope,yintercept)

```

```

if FinalEndMax > 0:

```

```

    LocalRange                =                data[FirstPoint+fitsize-
PointsBeforeMax:(FirstPoint+fitsize+PointsAfterMax)+1]

```

```

    LocalResidualStDev = findResidualStDev(LocalRange, findslope(LocalRange),
findYintercept(LocalRange,findslope(LocalRange)))

```

```

    EndMax=checkInterval(data[FirstPoint+fitsize:(FirstPoint+fitsize+PointsAfterMax)+1],LocalResi
dualStDev,slope,yintercept)

```

#above, the EndMax and EndMin are checked, to see if it should be increased or not (if  
it's not ended).

```

#Then, below it's either increased or not.

```

```

if EndMax == 0:

    CurrentTimeMax = CurrentTimeMax + step

if EndMin == 0:

    CurrentTimeMin = CurrentTimeMin - step

#now the min and max for the time interval being looked at are increased by the step if
their next points are okay

#otherwise they have no change and the loop starts again.

UpperPointInt = data[FirstPoint-PointsBeforeMin:(FirstPoint+PointsAfterMin)+1]

LowerPointInt          =          data[FirstPoint+fitsize-
PointsBeforeMax:(FirstPoint+fitsize+PointsAfterMax)+1]

LowerPointsResidualStDev          =          findResidualStDev(LowerPointInt,
findslope(LowerPointInt), findYintercept(LowerPointInt,findslope(LowerPointInt)))

UpperPointsResidualStDev          =          findResidualStDev(UpperPointInt,
findslope(UpperPointInt), findYintercept(UpperPointInt,findslope(UpperPointInt)))

correlation = findCorrelation(data[FirstPoint:(FirstPoint+fitsize)+1])

output.append([CurrentTimeMin,      CurrentTimeMax,      slope,      yintercept,
LowerPointsResidualStDev, UpperPointsResidualStDev])

extraPoints = extraPointCounter

#then the program has to loop back to searching in every point w/in
new interval,

#unless the extraPointCounter is not greater than 1, which is checked
here.

#The Current Time Min, fitsize & first point will be wherever they were on the final loop of
above

#The correlation and range will be determined from them.

output.append([CurrentTimeMin,      CurrentTimeMax,      slope,      yintercept,      ResidualStDev,
correlation])

slope = findslope(data[FirstPoint:(FirstPoint+fitsize)+1])

```

```

correlation = findCorrelation(data[FirstPoint:(FirstPoint+fitsize)+1])

yintercept = findYintercept(data[FirstPoint:(FirstPoint+fitsize)+1],slope)

ResidualStDev = findResidualStDev(data[FirstPoint:(FirstPoint+fitsize)+1], slope, yintercept)

#the final output consists of the Onset, Endset, the slope, y-intercept, the residual's standard
deviation, and the Correlation Coeff

output.append([CurrentTimeMin,    CurrentTimeMax,    slope,    yintercept,    ResidualStDev,
correlation])

printOutput(outfile, output)

if __name__ == "__main__":
    main(sys.argv[1:])

```

**Appendix S.3:** Alpha plots of experiments.

16

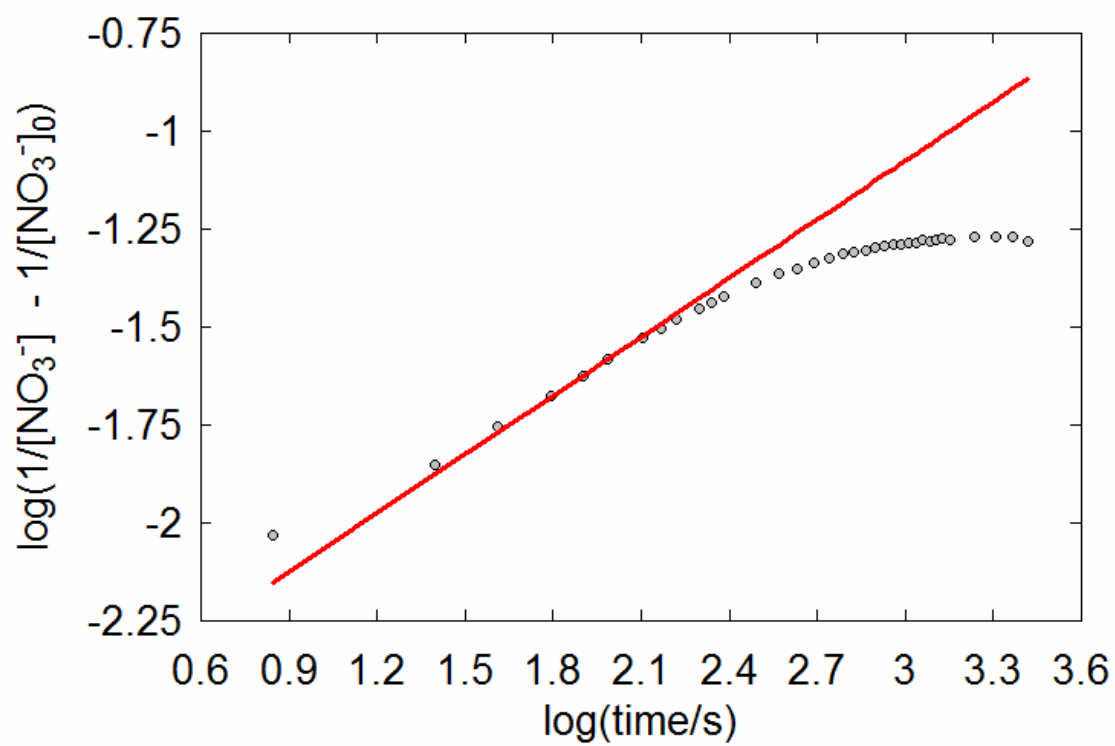

17

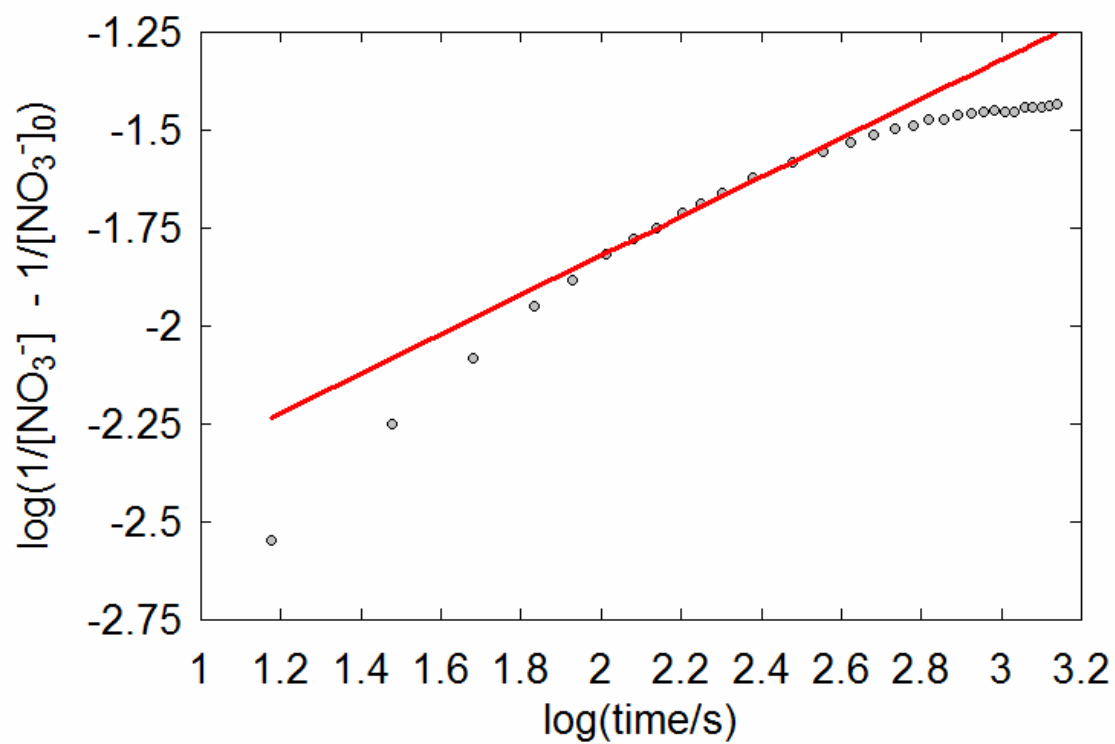

18

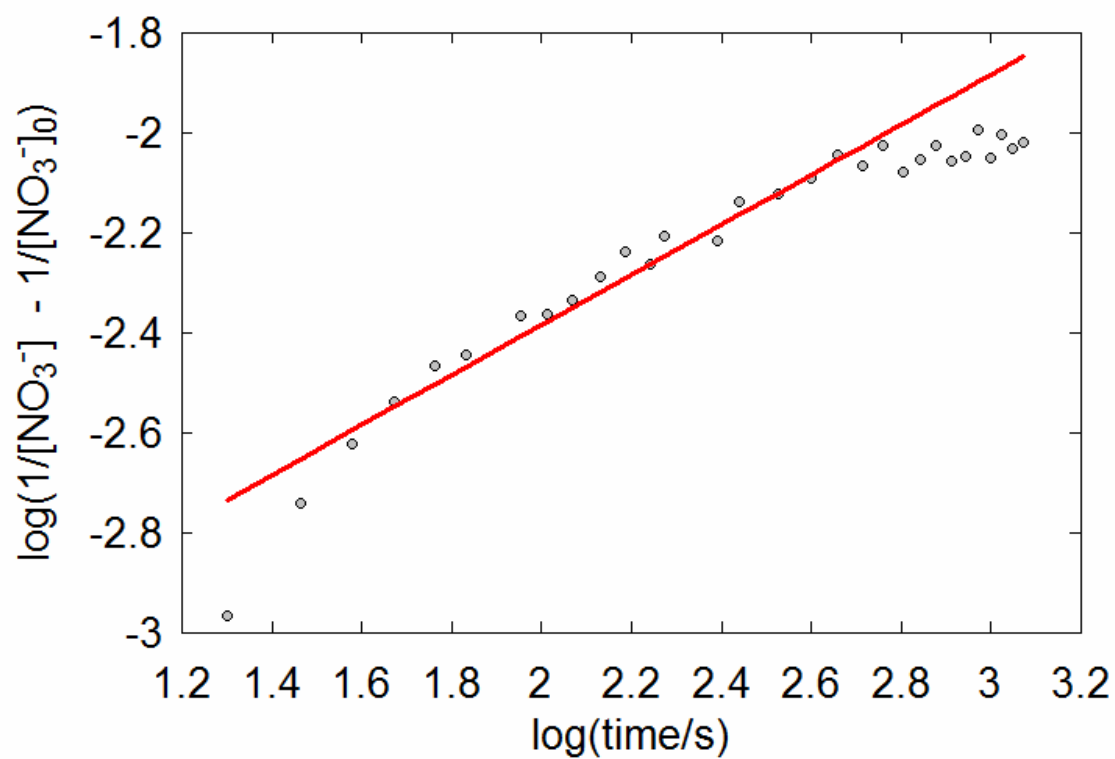

19

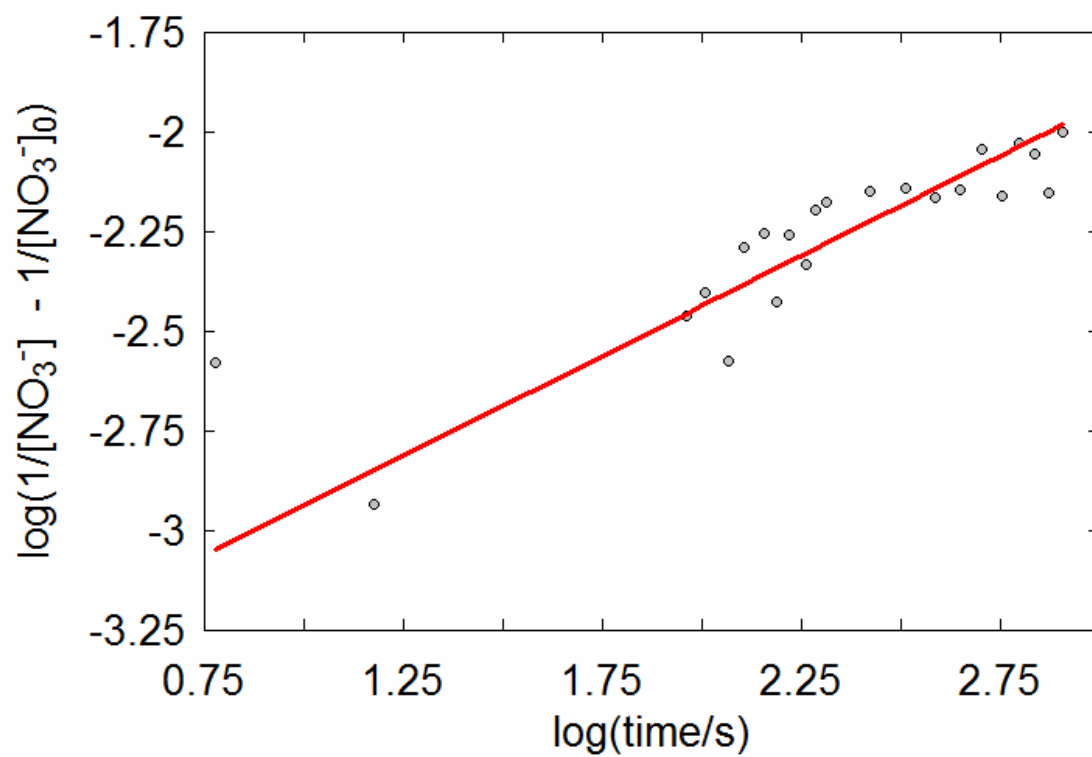

21

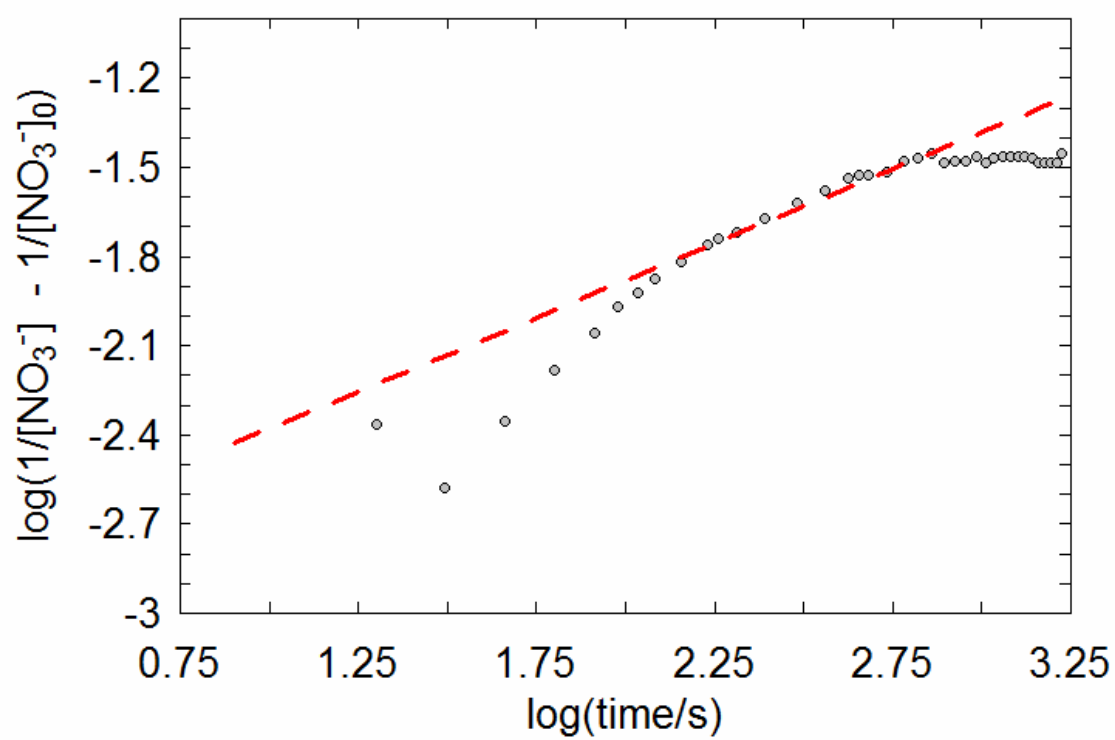

22b

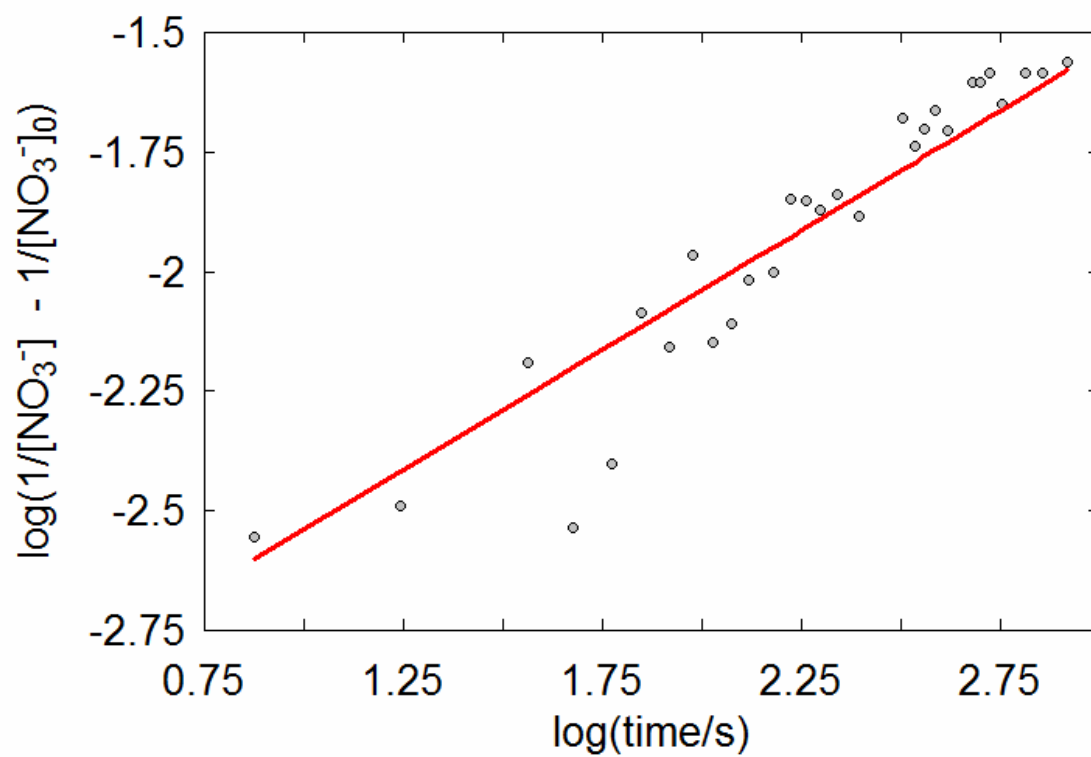

22c

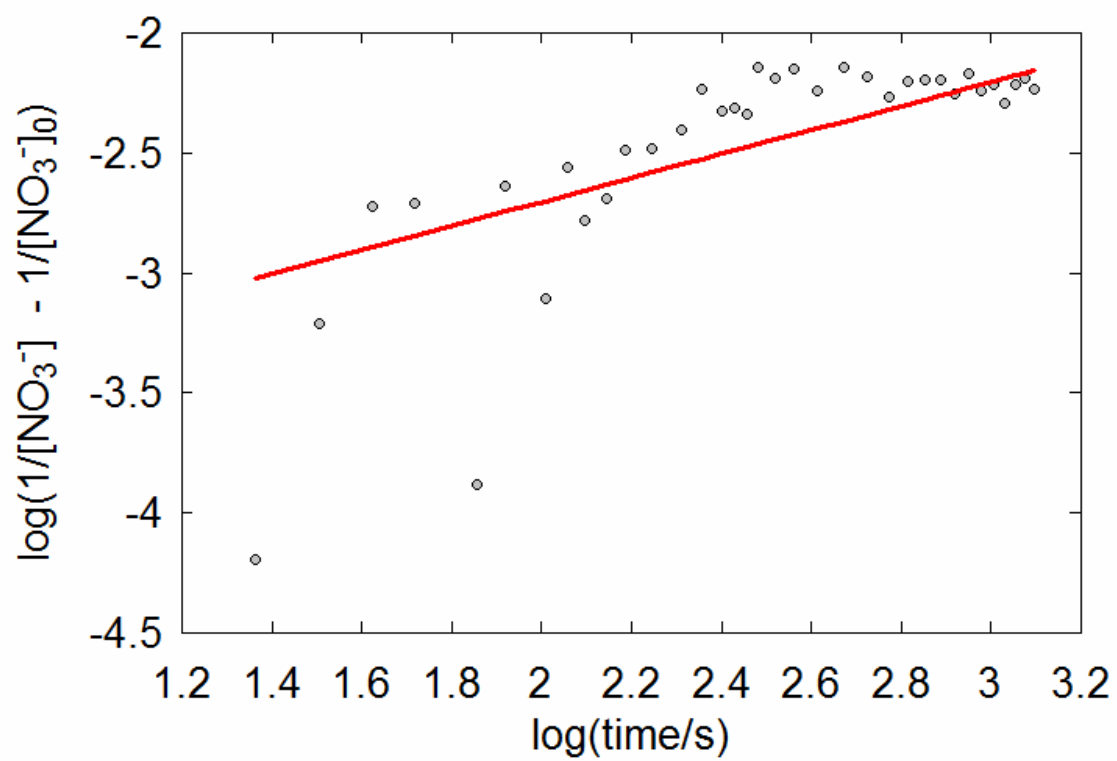

22d

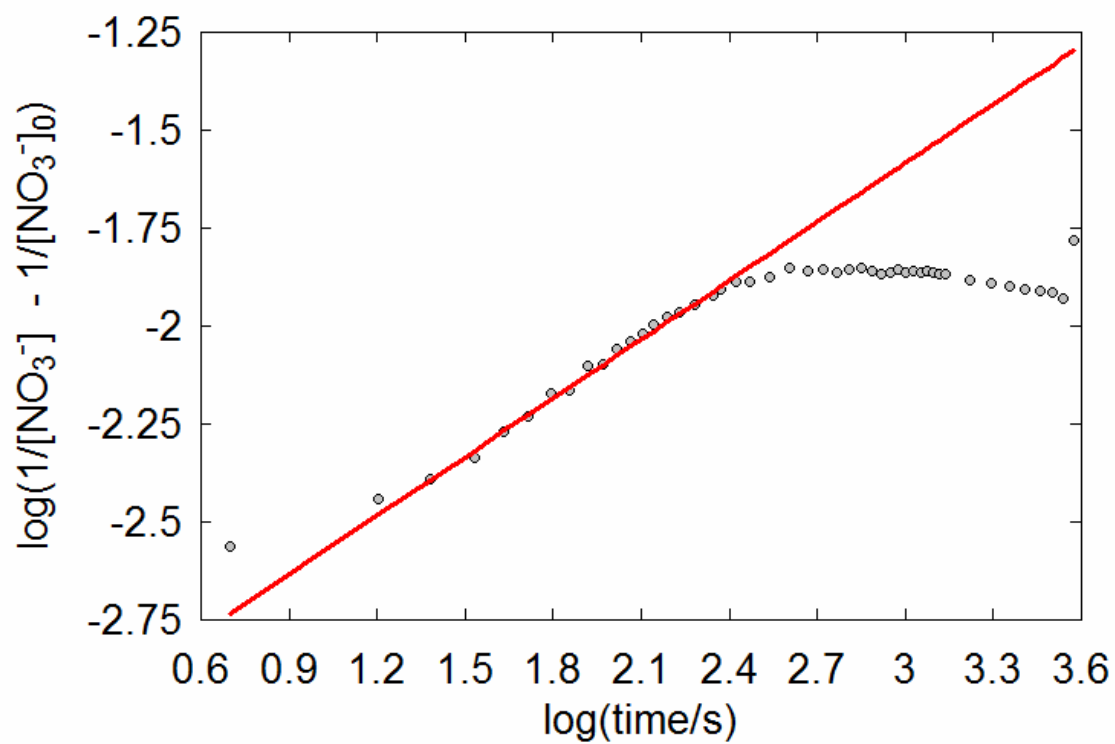

22e

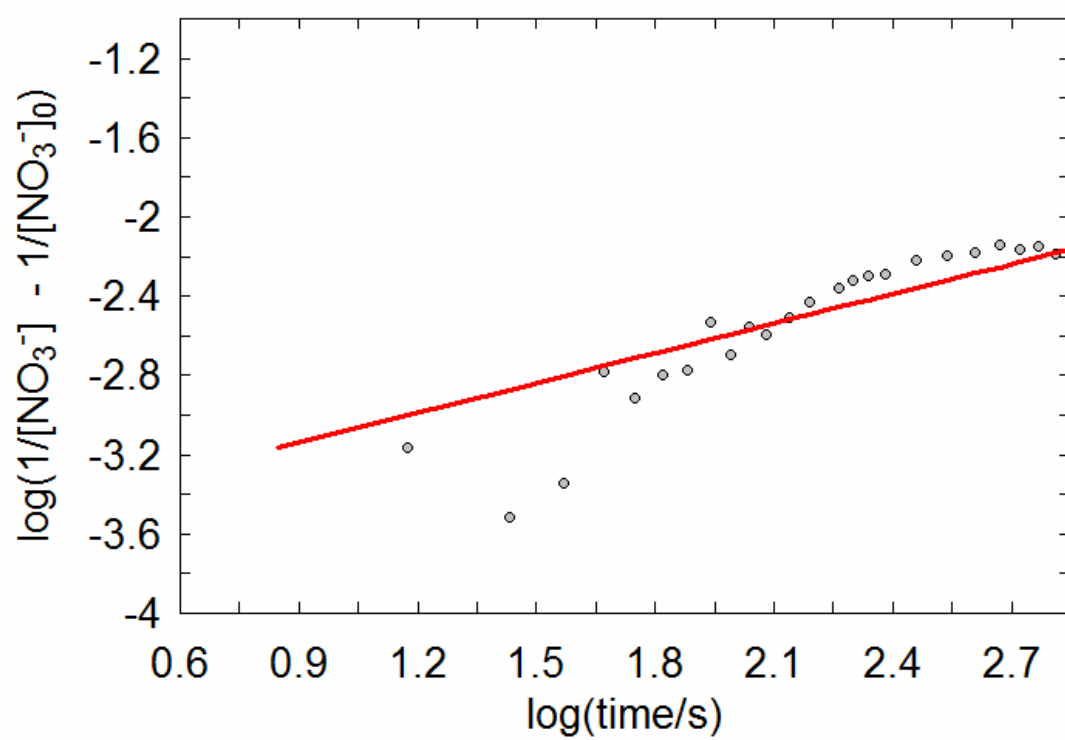

22f

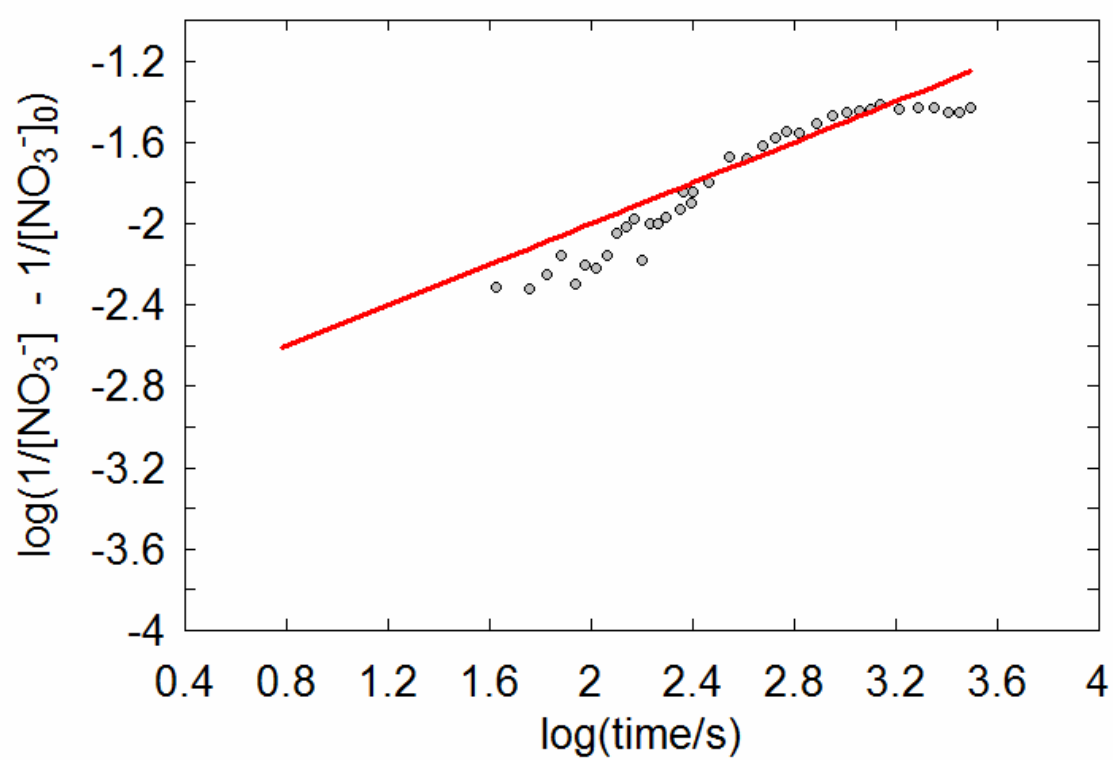

60

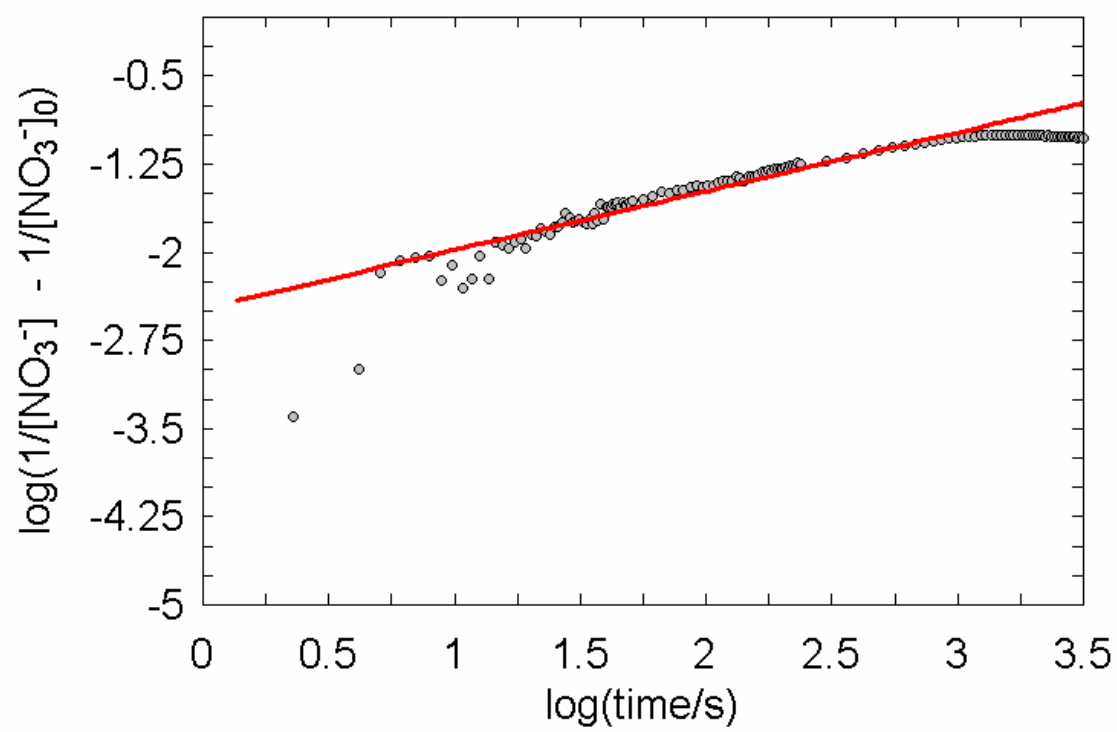

61

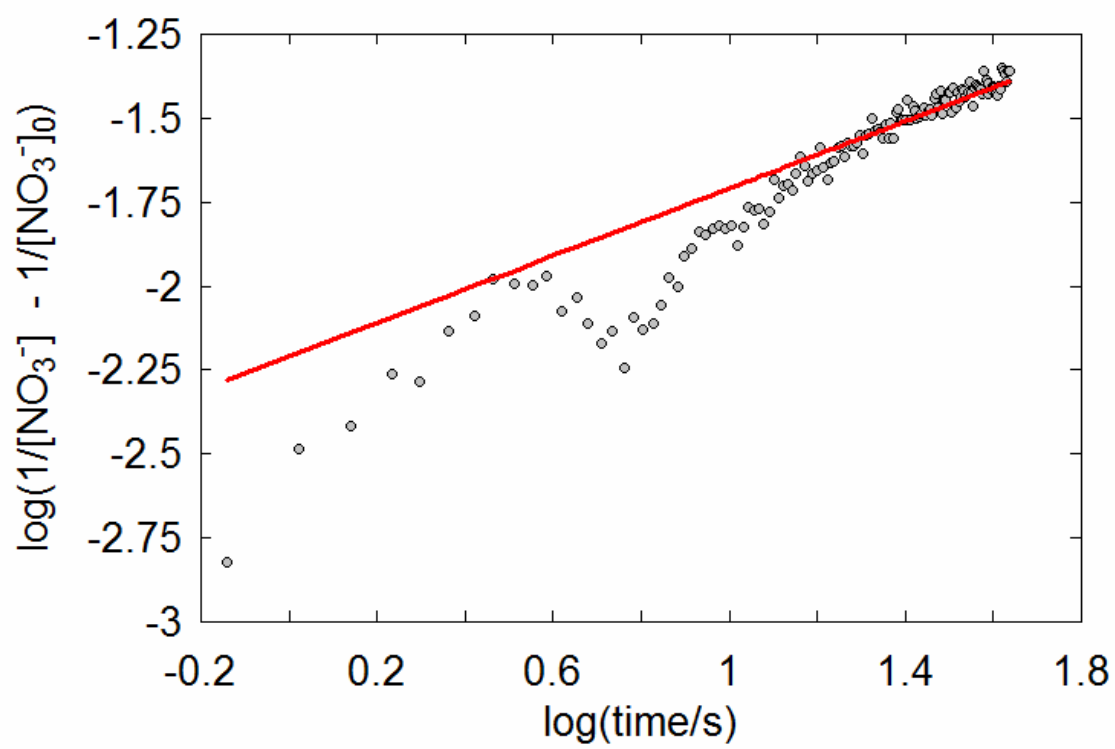

62

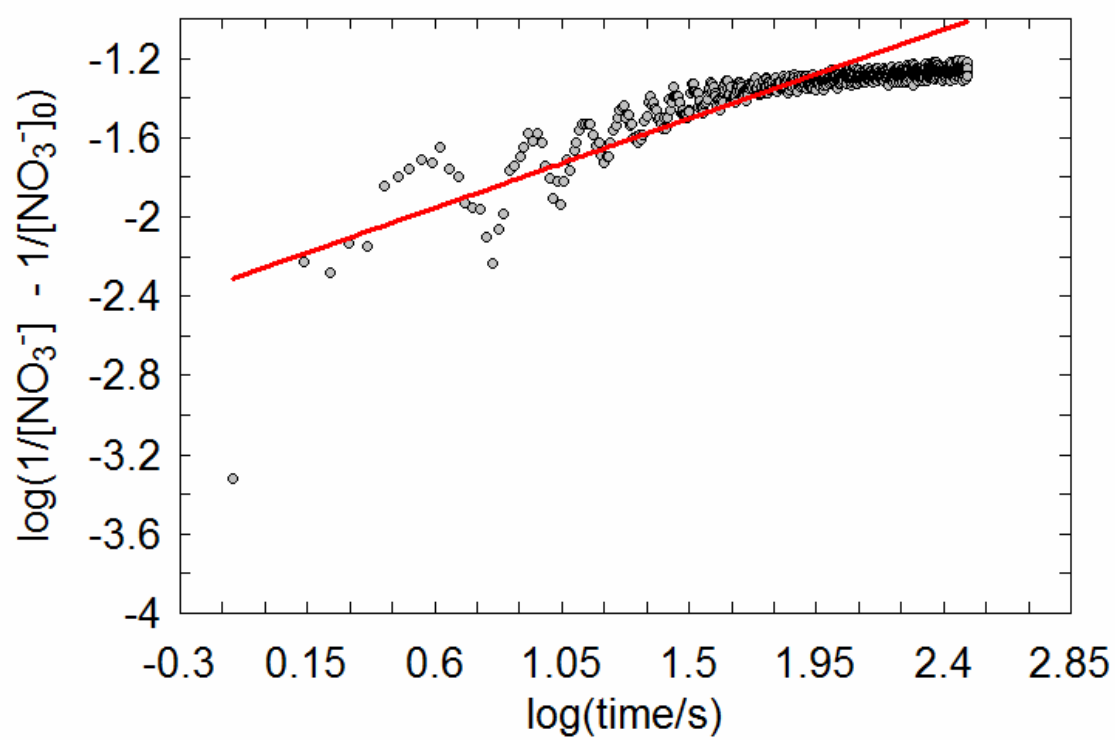

63

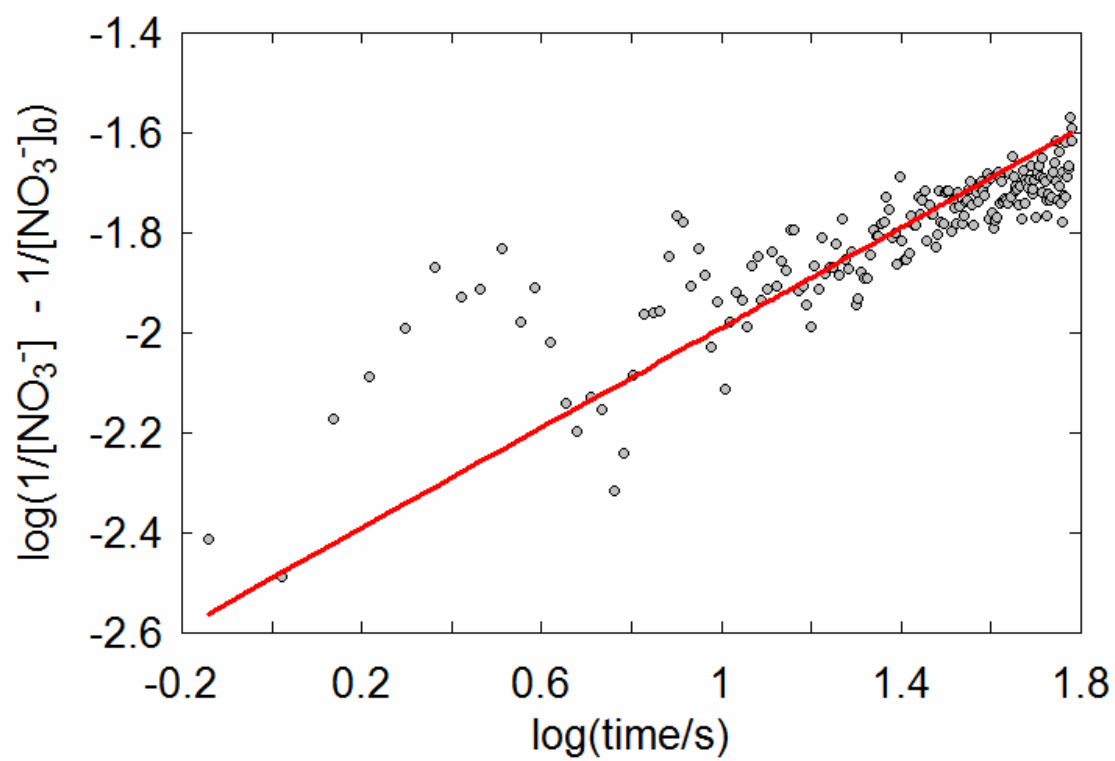

71

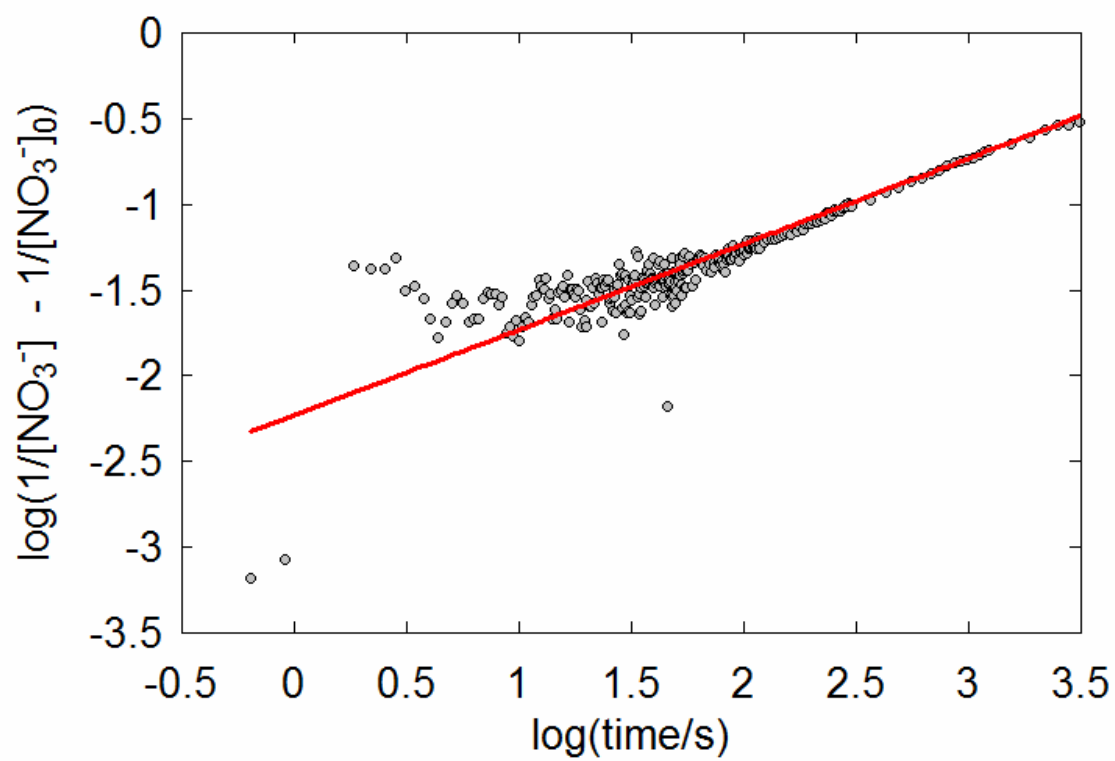

72

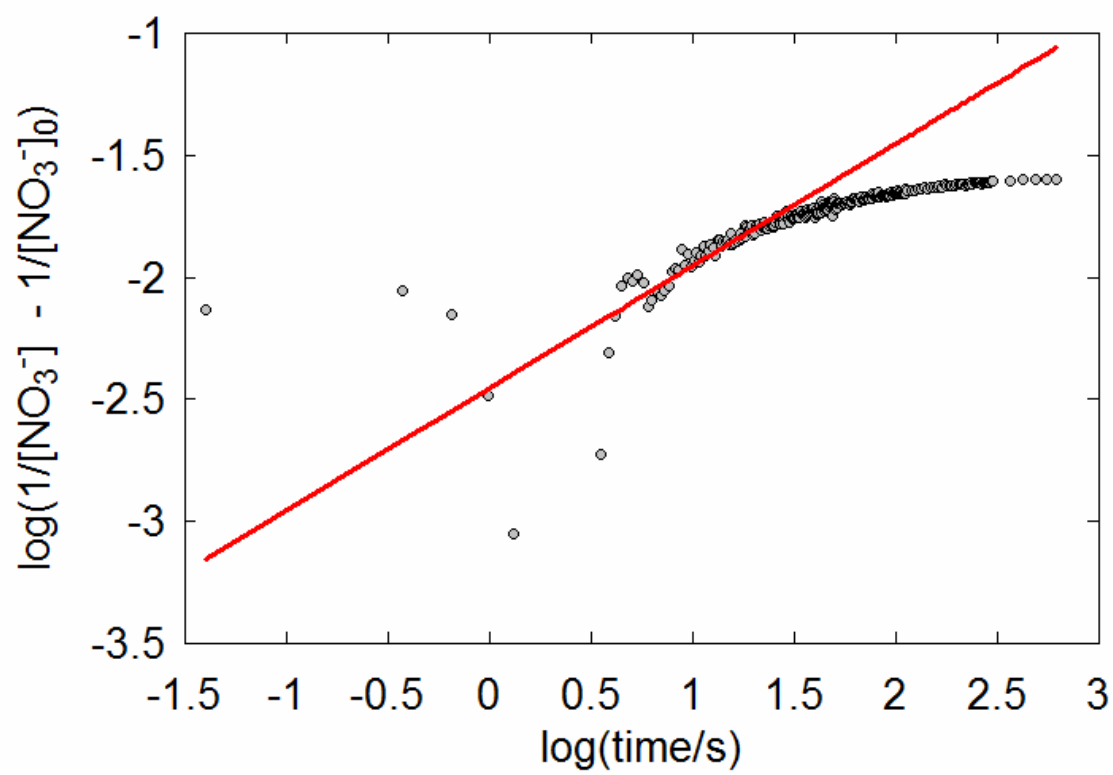

73

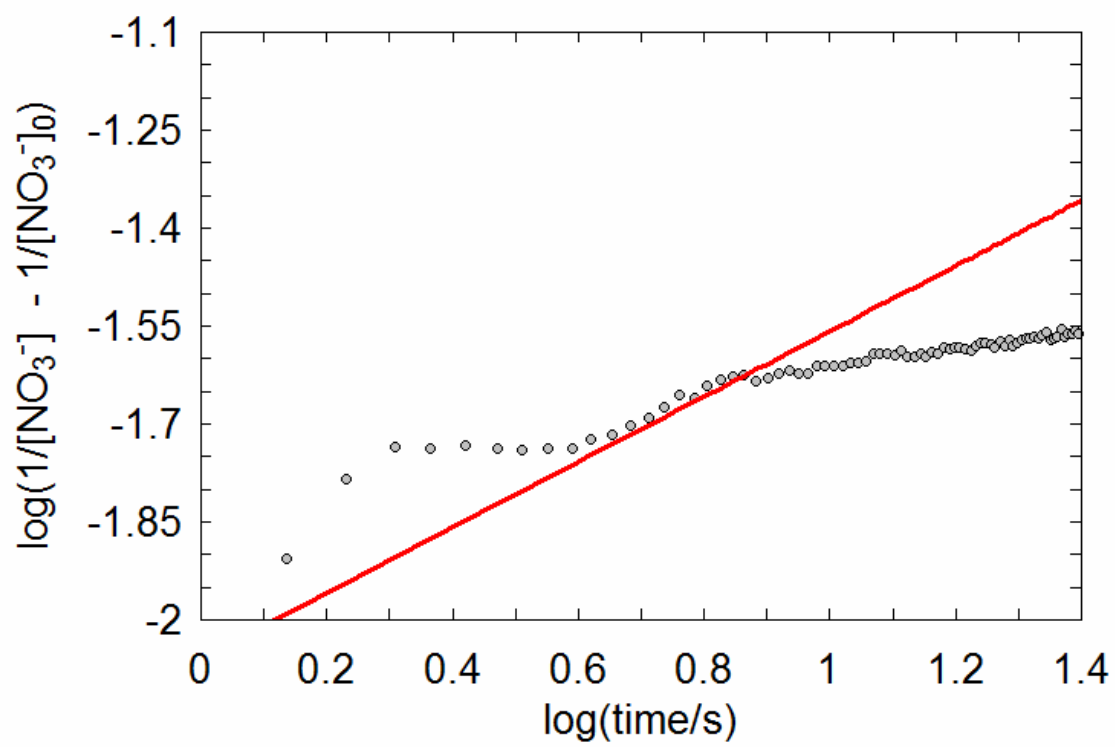

74

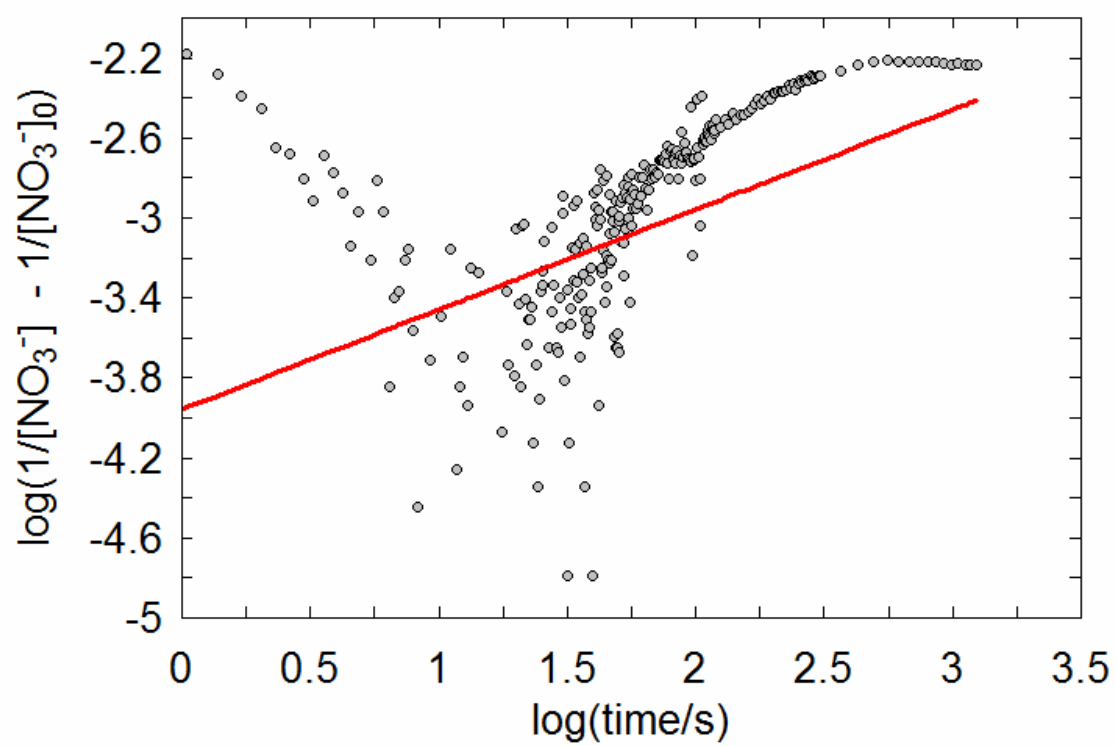

75

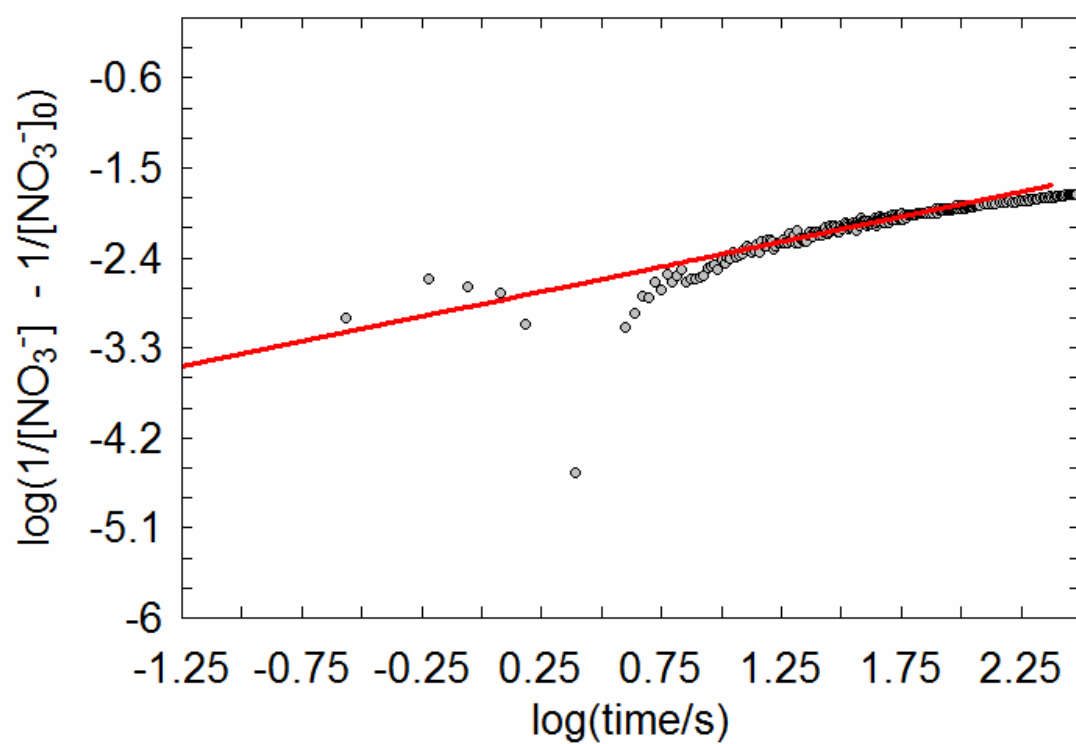

77

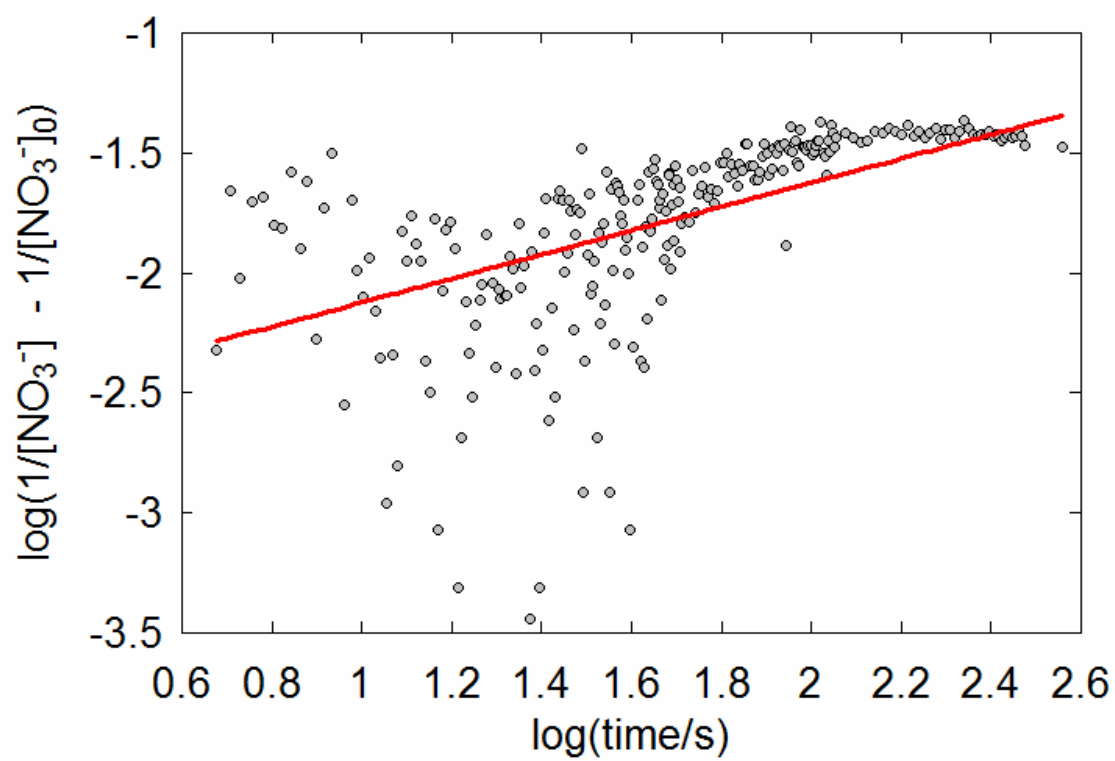

79

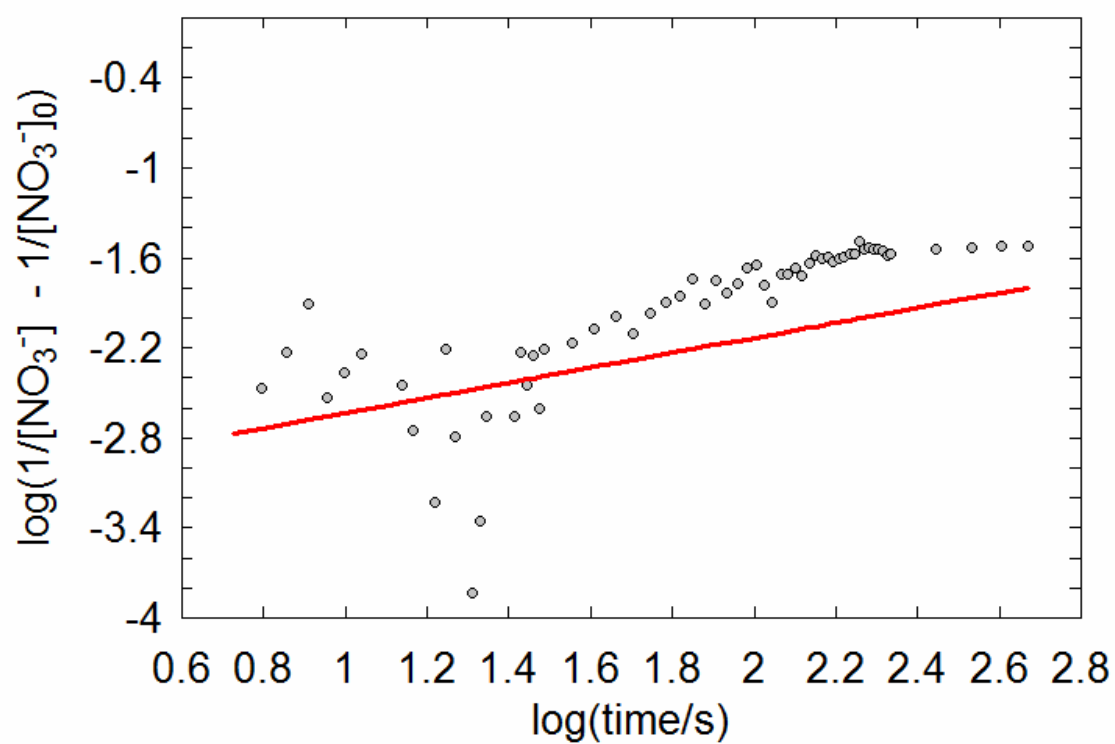

80

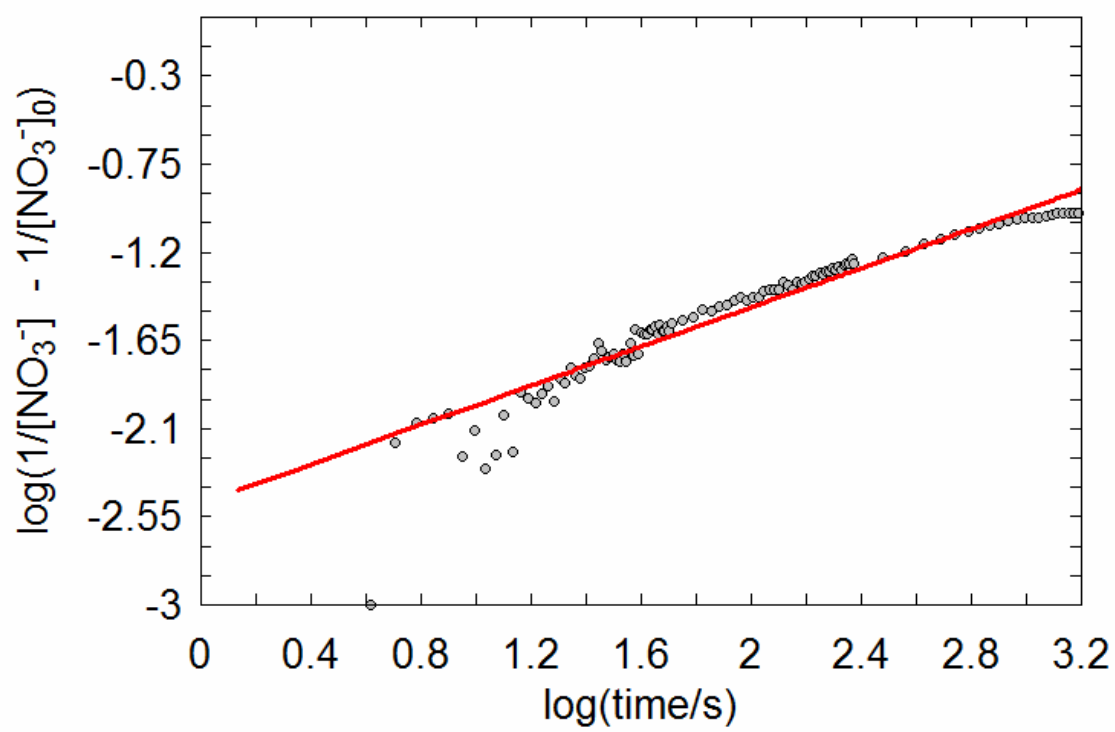

153

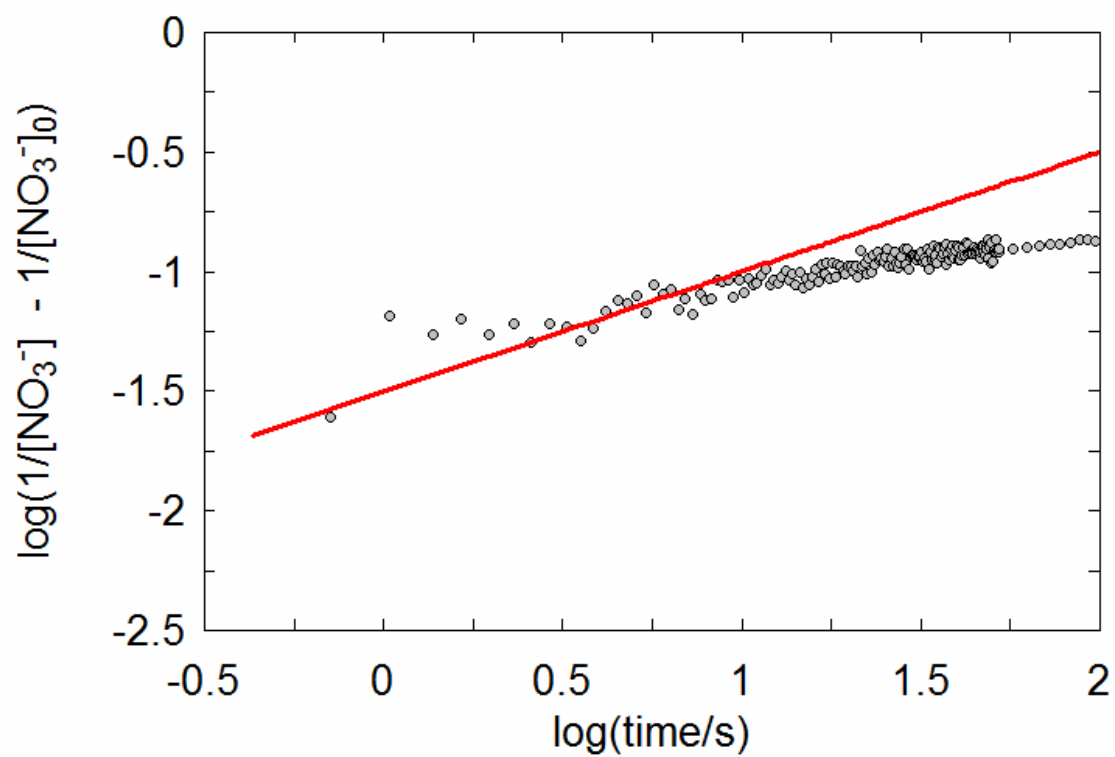

154

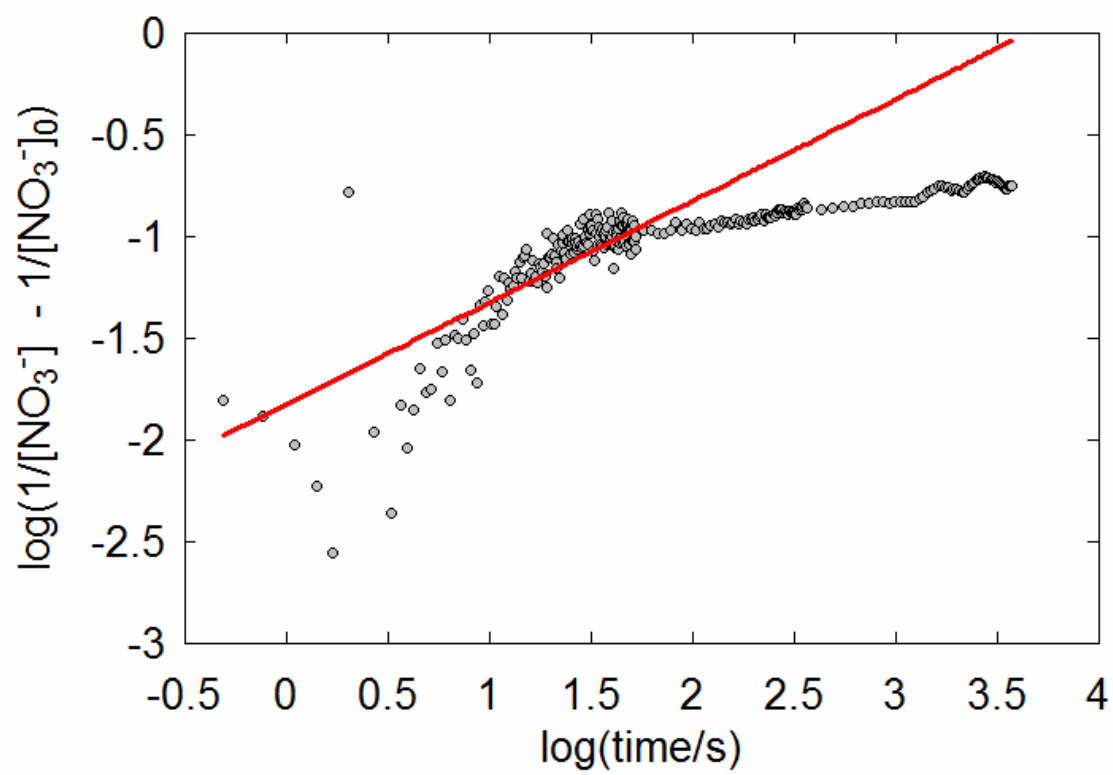

155

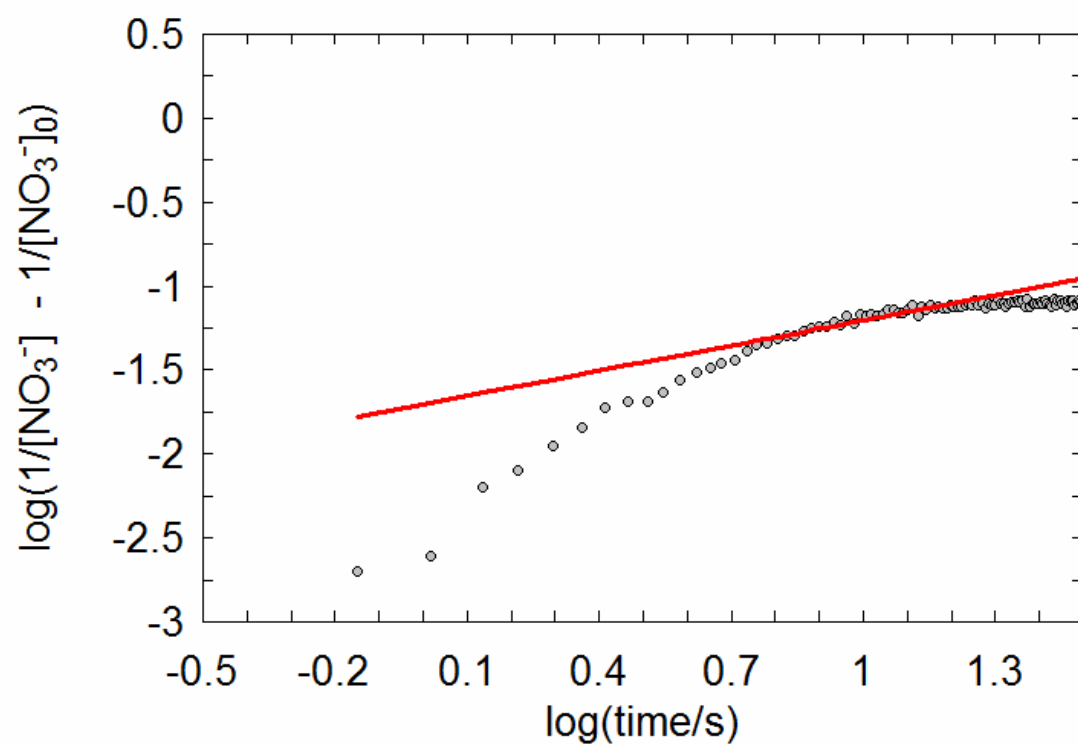

158

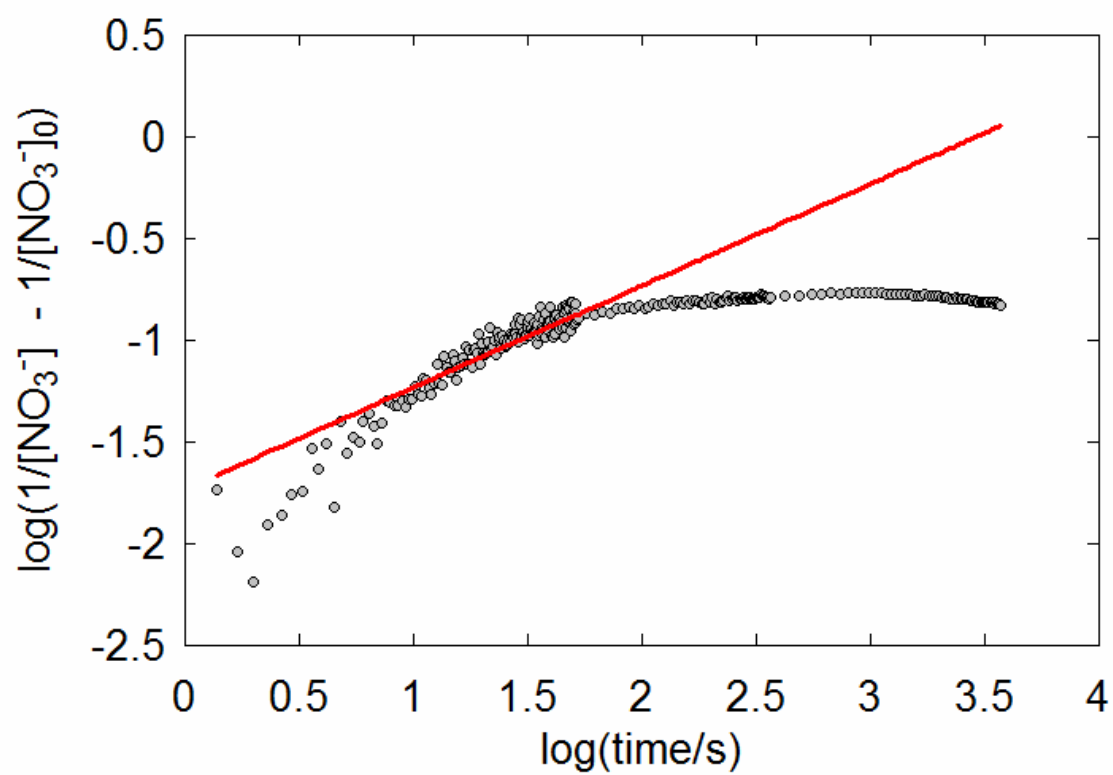

159

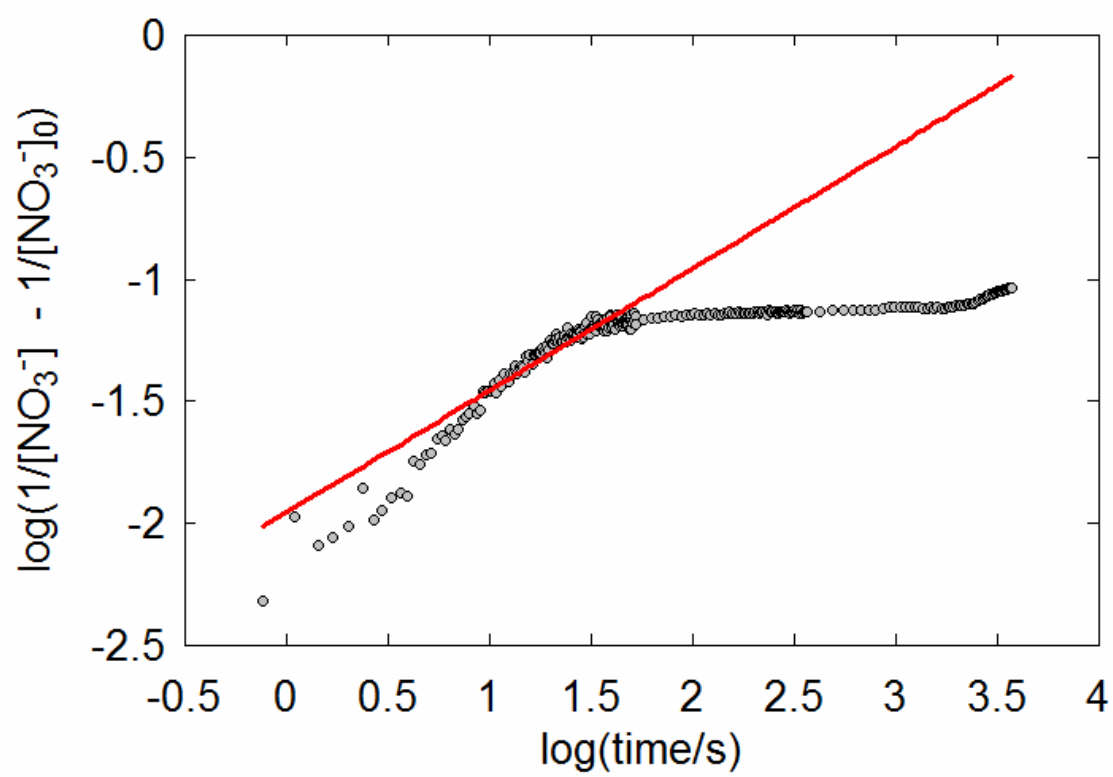

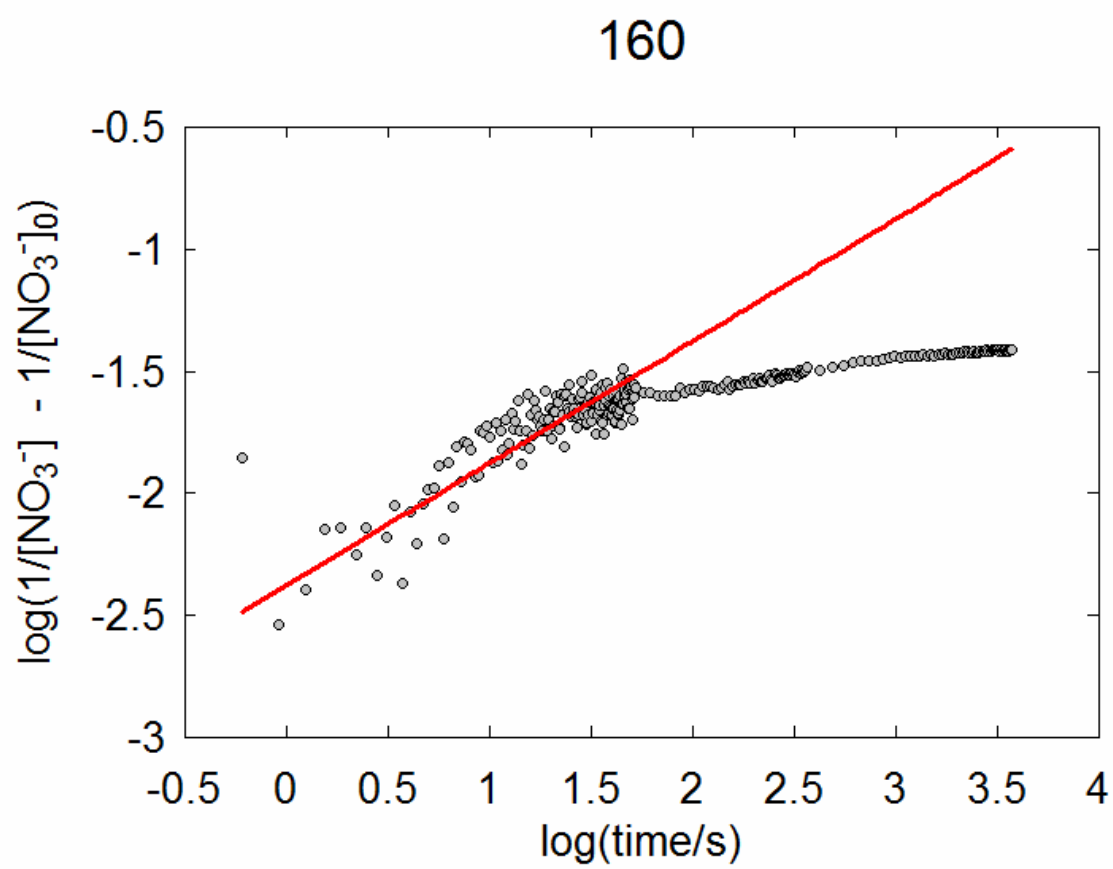

161

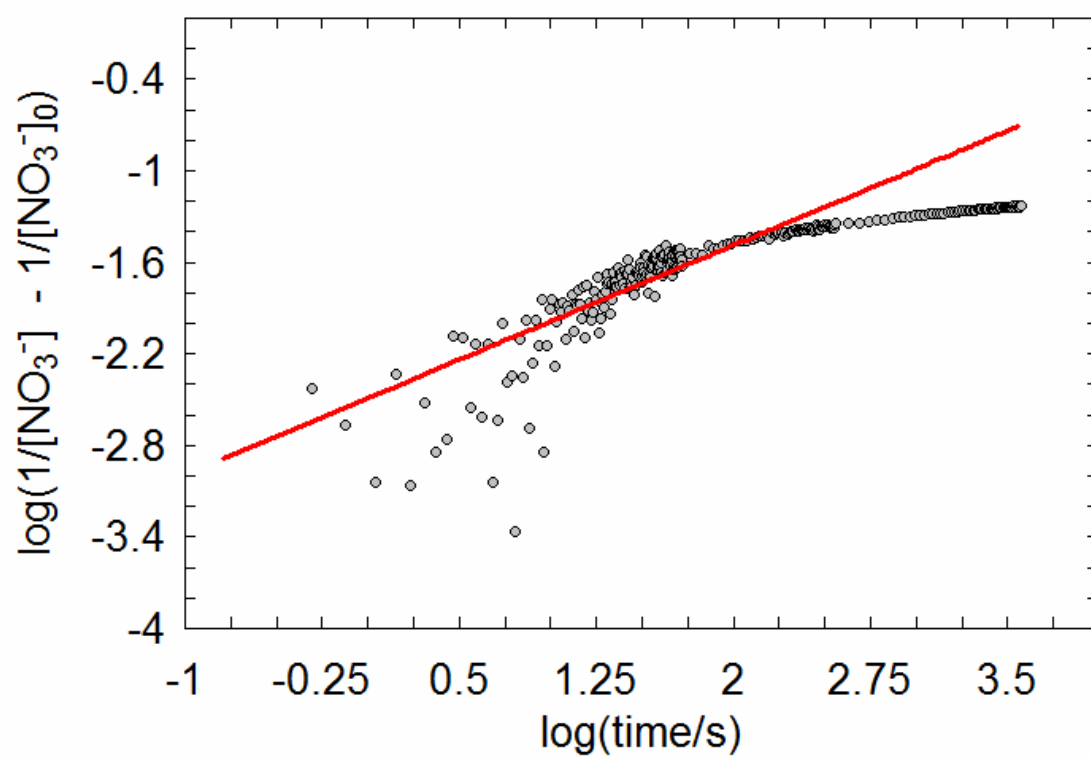

162

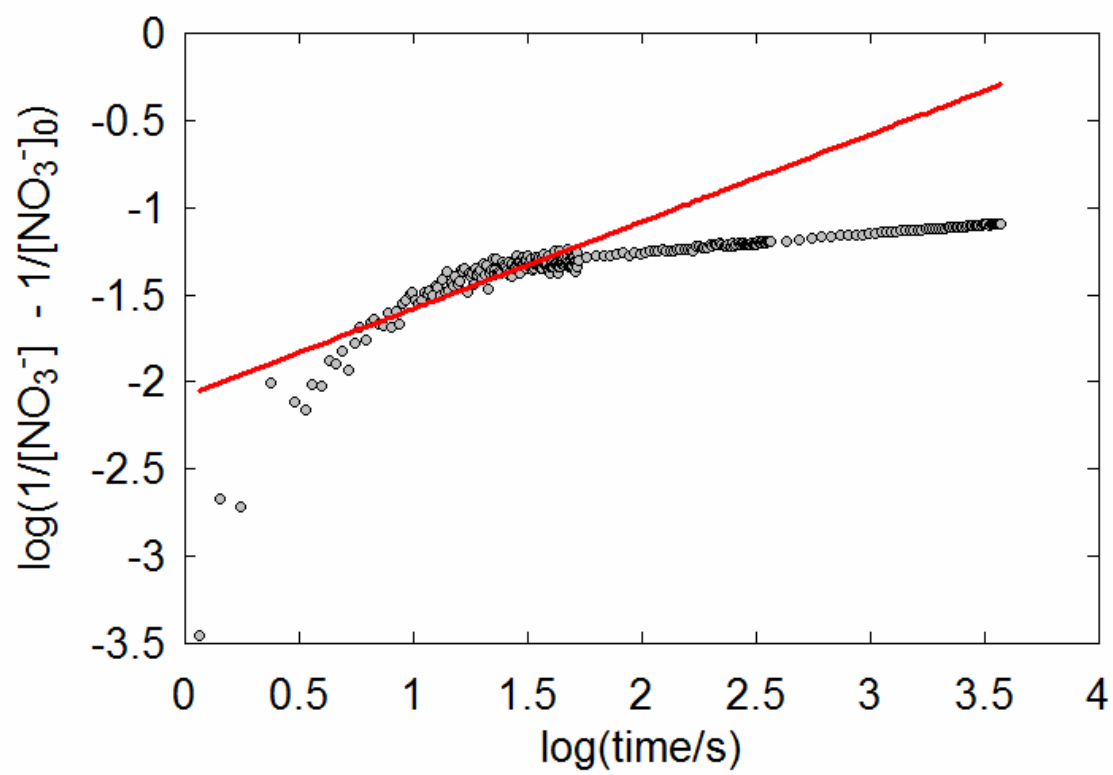

163

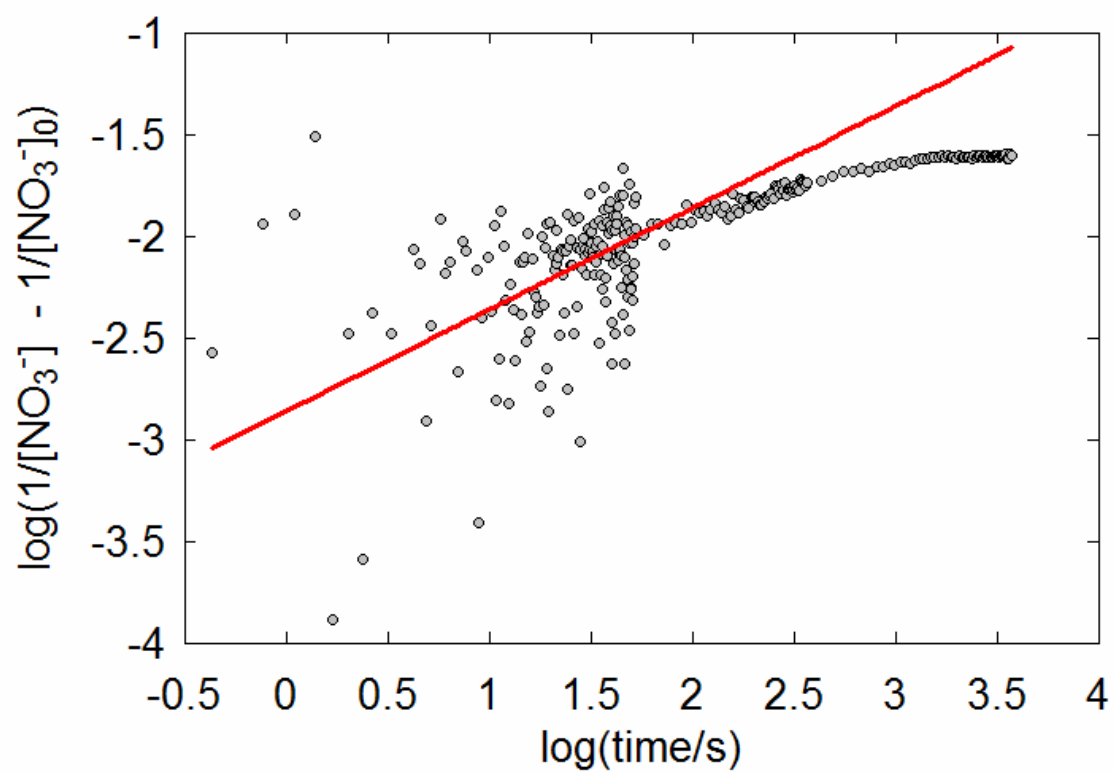

165

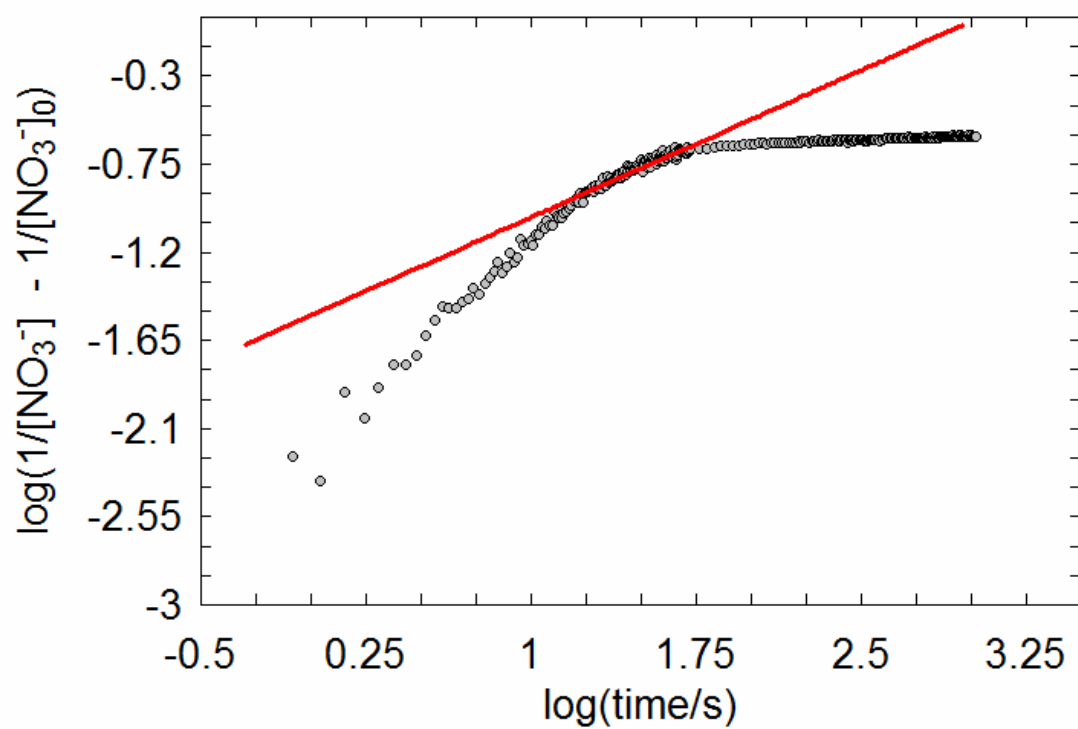

166

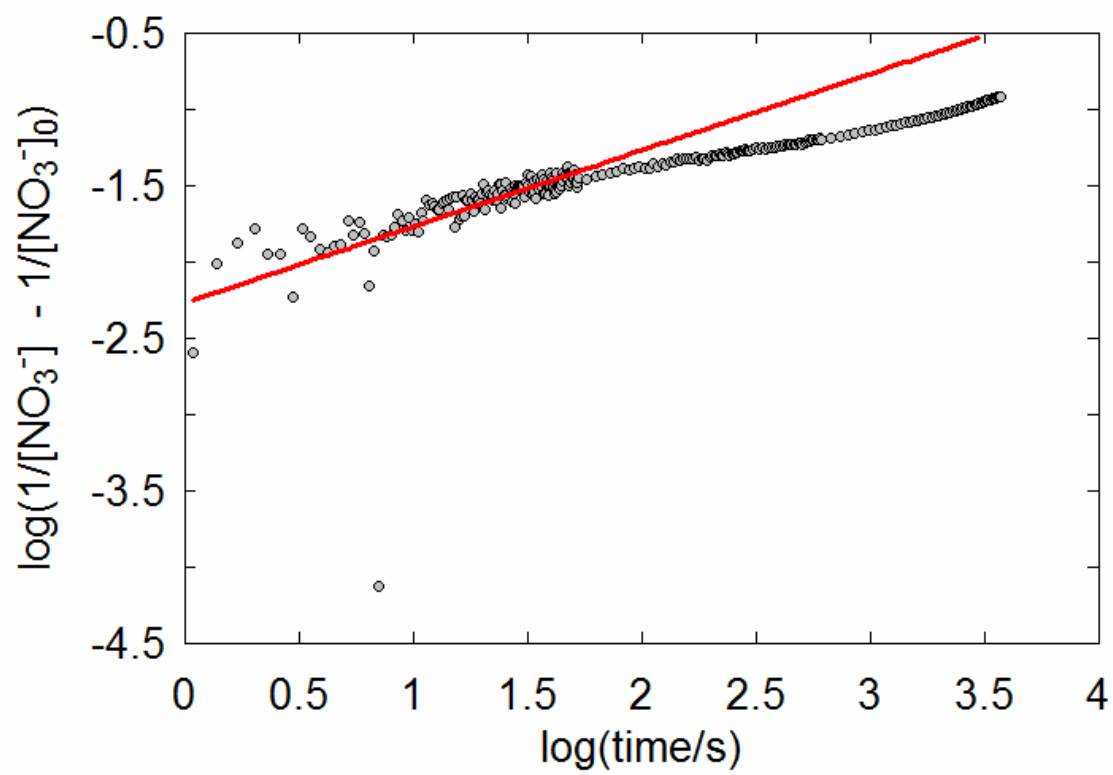

167

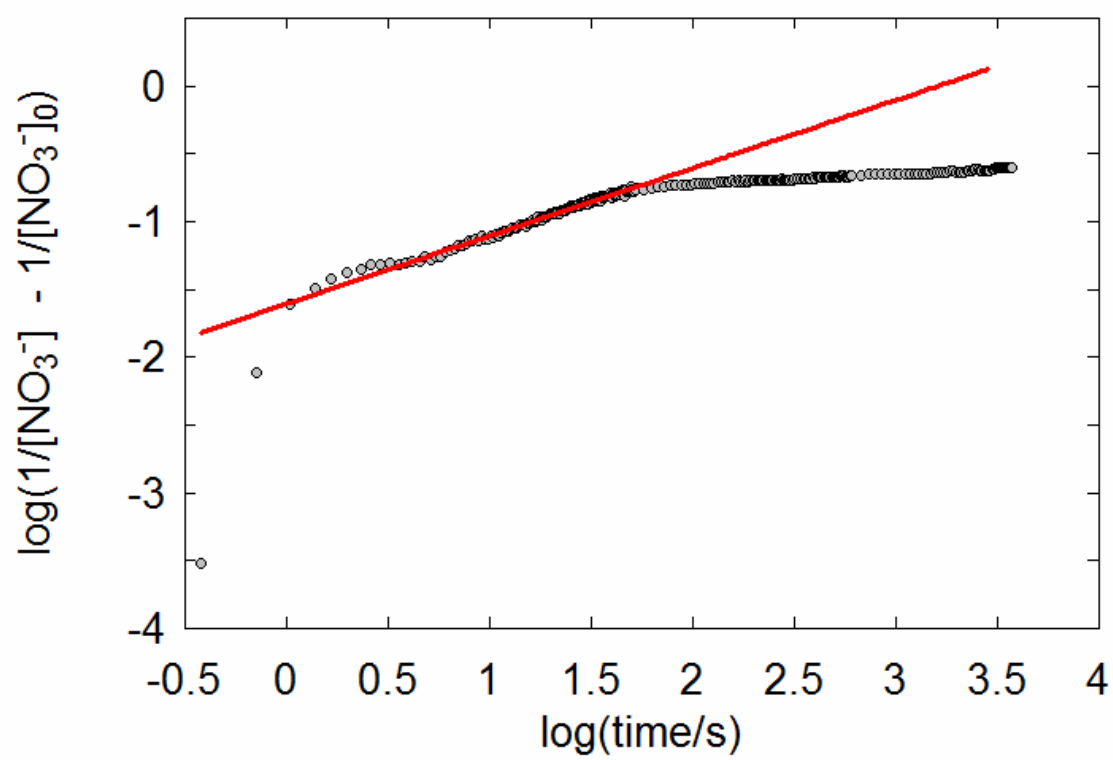

168

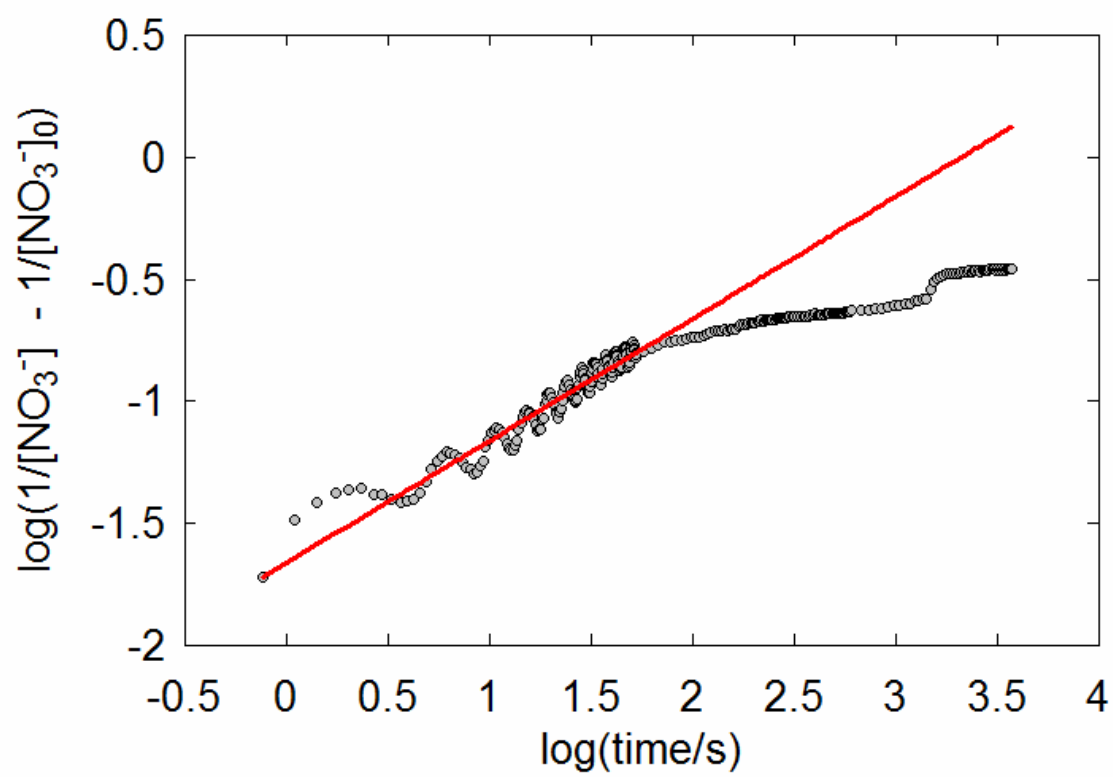

Supplement: Supplementary file 1 [file 4382116]
